# Supplementary material for: Photoperiod-1 regulates the wheat inflorescence transcriptome to influence spikelet architecture and flowering time
Source: PubMed Central journal article supplement — Curr Biol. 2024 Jun 3;34(11):2330–2343.e4. doi: 10.1016/j.cub.2024.04.029 (PMC11149547; doi:10.1016/j.cub.2024.04.029), 2024-06-03
Supplement: mmc7.pdf [file mmc7.pdf]

# Current Biology

## ***Photoperiod-1* regulates the wheat inflorescence transcriptome to influence spikelet architecture and flowering time**

### Graphical abstract

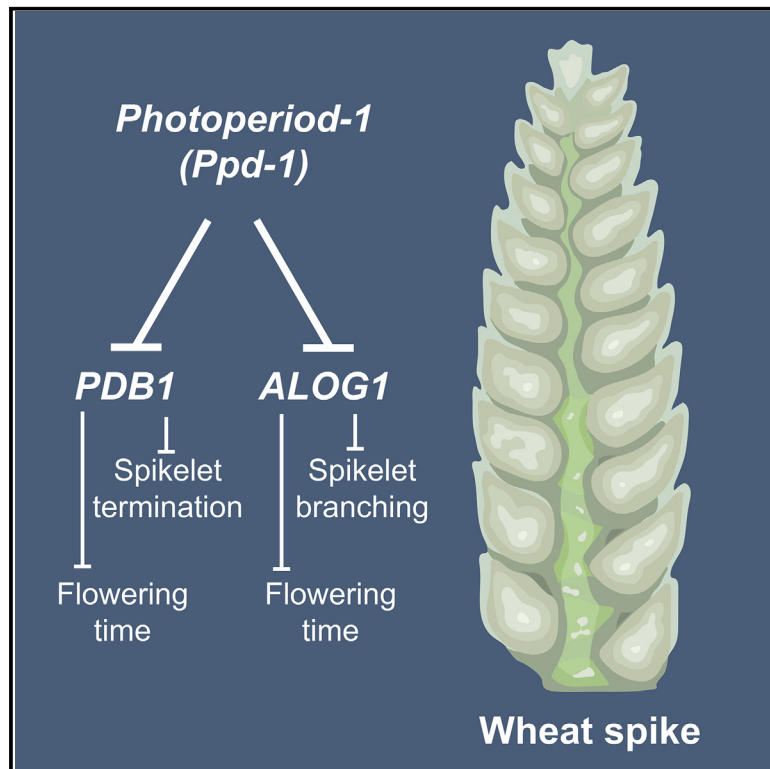

### Authors

Adam Gauley, Marianna Pasquariello, Guilherme V. Yoshikawa, ..., Mark A. Smedley, Laura E. Dixon, Scott A. Boden

### Correspondence

scott.boden@adelaide.edu.au

### In brief

Gauley et al. investigate the influence of *Photoperiod-1* (*Ppd-1*) during early wheat inflorescence development and identify two transcription factors that are regulated by *Ppd-1* to control flowering time and inflorescence architecture.

### Highlights

- *Ppd-1* significantly influences the transcriptome of a developing wheat inflorescence
- *PDB1* regulates photoperiod-insensitive flowering and spikelet termination
- *ALOG1* suppresses spikelet branching and delays flowering
- *ALOG1* shares a conserved role in the Triticeae crops wheat and barley

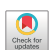

Article

# Photoperiod-1 regulates the wheat inflorescence transcriptome to influence spikelet architecture and flowering time

Adam Gauley,<sup>1,2,4</sup> Marianna Pasquariello,<sup>1</sup> Guilherme V. Yoshikawa,<sup>3</sup> Abdul Kader Alabdullah,<sup>1</sup> Sadiye Hayta,<sup>1</sup> Mark A. Smedley,<sup>1</sup> Laura E. Dixon,<sup>1,2</sup> and Scott A. Boden<sup>1,3,5,6,\*</sup>

<sup>1</sup>Department of Crop Genetics, John Innes Centre, Norwich Research Park, Colney Lane, Norwich NR4 7UH, UK

<sup>2</sup>Faculty of Biological Sciences, University of Leeds, Woodhouse Lane, Leeds LS2 9JT, UK

<sup>3</sup>School of Agriculture, Food and Wine, Waite Research Institute, University of Adelaide, Hartley Grove, Glen Osmond, SA 5064, Australia

<sup>4</sup>Present address: Agri-Food and Business Institute, Houston Road, Belfast BT6 9SH, UK

<sup>5</sup>X (formerly Twitter): @sbodes12

<sup>6</sup>Lead contact

\*Correspondence: [scott.boden@adelaide.edu.au](mailto:scott.boden@adelaide.edu.au)

<https://doi.org/10.1016/j.cub.2024.04.029>

## SUMMARY

Photoperiod insensitivity has been selected by breeders to help adapt crops to diverse environments and farming practices. In wheat, insensitive alleles of *Photoperiod-1* (*Ppd-1*) relieve the requirement of long day-lengths to flower by promoting expression of floral promoting genes early in the season; however, these alleles also limit yield by reducing the number and fertility of grain-producing florets through processes that are poorly understood. Here, we performed transcriptome analysis of the developing inflorescence using near-isogenic lines that contain either photoperiod-insensitive or null alleles of *Ppd-1*, during stages when spikelet number is determined and floret development initiates. We report that *Ppd-1* influences the stage-specific expression of genes with roles in auxin signaling, meristem identity, and protein turnover, and analysis of differentially expressed transcripts identified bZIP and ALOG transcription factors, namely PDB1 and ALOG1, which regulate flowering time and spikelet architecture. These findings enhance our understanding of genes that regulate inflorescence development and introduce new targets for improving yield potential.

## INTRODUCTION

Flowering time is a key adaptative trait that contributes substantially to the reproductive fitness of plants by aligning fertilization and seed production with favorable environmental conditions. Ancient and modern breeders have used genetic variation for photoperiod responsiveness to expand the geographic distribution of crop cultivation by accelerating flowering, which can limit yield potential by reducing the number of flowers available for grain or fruit production.<sup>1–9</sup> With global demands for food rising, an improved understanding of processes that act downstream of photoperiod-responsive genes in inflorescences is required to identify strategies for optimizing yield potential in fast-flowering genotypes.

In long-day plants, such as bread wheat (*Triticum aestivum* L.), flowering is promoted by the extending days of spring.<sup>1,10</sup> The responsiveness of wheat to long daylengths is determined largely by allelic variation for *Photoperiod-1* (*Ppd-1*), which encodes a pseudo-response regulator.<sup>1,9</sup> Photoperiod-insensitive alleles of *Ppd-1* (e.g., *Ppd-D1a*) are used widely in breeding to reduce the requirement for long daylengths, promoting flowering earlier in the season, relative to sensitive alleles; early flowering alleles help ensure grain is set in marginal environments where seasonal conditions limit the duration of plant growth.<sup>11–14</sup>

Photoperiod-insensitive alleles accelerate flowering by hastening and increasing the expression of FLOWERING LOCUS T1 (FT1), a conserved floral activator, which is expressed in leaves and transported to the shoot apical meristem to promote inflorescence development.<sup>1,10,15,16</sup> While the effect of photoperiod-insensitive alleles on FT1 activity in leaves and the consequences for flowering time are well characterized, very little is known about their influence on gene expression in the developing inflorescence, particularly when spikelets and florets begin to form.<sup>1,10,15,17,18</sup> It is crucial that we learn more about the effect of *Ppd-1* on the developing inflorescence transcriptome because photoperiod-insensitive alleles significantly reduce spikelet number, floret number, and fertility, which are key yield determinants.<sup>7,8,13</sup> Knowledge of genes that act downstream of *Ppd-1* in the inflorescence could provide new breeding strategies to improve yield potential by balancing the effects of photoperiod insensitivity on flowering time and grain production.<sup>7,8,15</sup>

To investigate the effect of *Ppd-1* on gene expression in the inflorescence, we performed RNA sequencing (RNA-seq) transcriptome analysis during early developmental stages using near isogenic lines (NILs) that contain either photoperiod-insensitive or -sensitive alleles of *Ppd-1*, or are *ppd-1* null mutants across all three genomes.<sup>10,11,17</sup> Our analysis shows that *Ppd-1* modifies the activation and suppression of gene activity

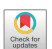

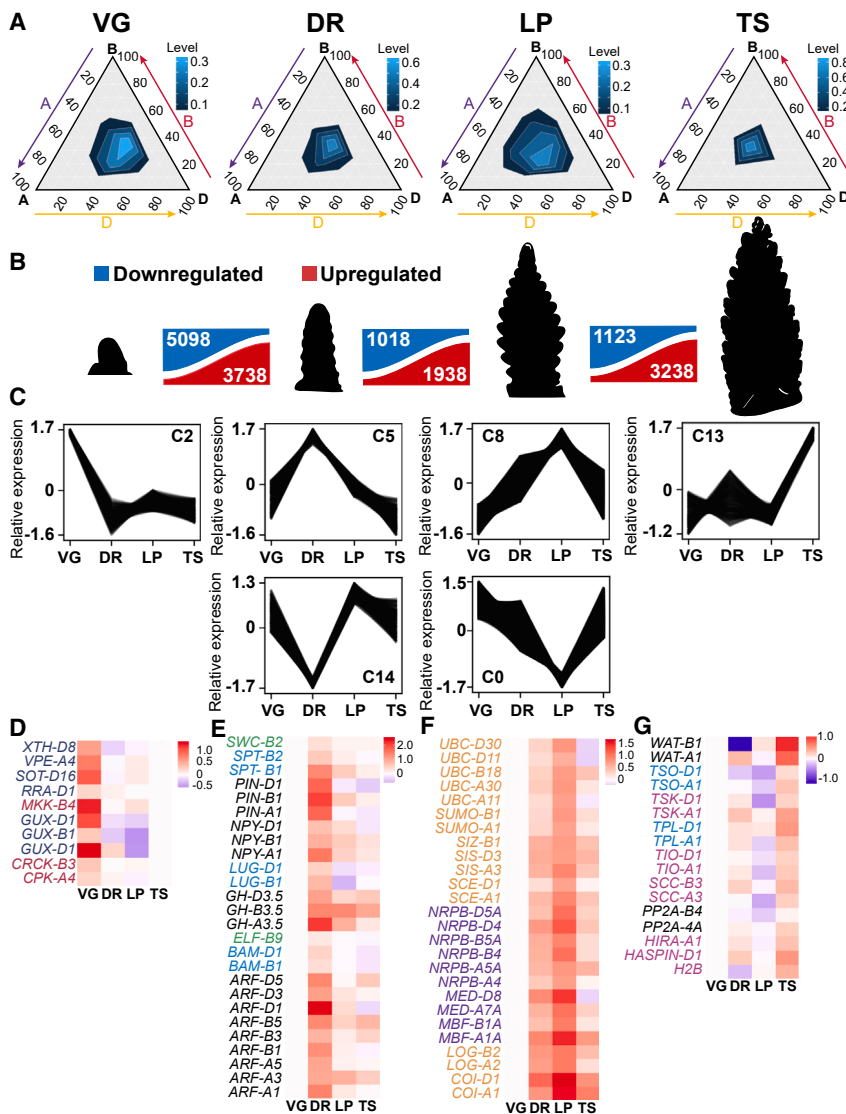

**Figure 1. The transcriptional landscape of early inflorescence development in wheat**

(A) Ternary plots showing relative transcript abundance of 21,627 gene triads during vegetative (VG), double ridge (DR), lemma primordium (LP), and terminal spikelet (TS) stages. Each corner represents the A (purple arrow), B (purple arrow), or D genome (yellow arrow), with the scale representing percentage contribution by that genome: lighter shades of blue represent higher transcript density.

(B) A summary of transcripts that are significantly up- (red) or downregulated (blue) between successive stages of inflorescence development in wild type (cv. Paragon).

(C) Transcript clusters that show stage-specific profiles at VG (C2), DR (C5 and C14), LP (C8 and C0), and TS (C13).

(D–G) Heatmaps displaying transcripts from the C2 (D), C5 (E), C8 (F), and C13 (G) that encode proteins enriched in the GO terms identified in the respective clusters. In C2, transferases (indigo text) and kinases (red); C5, auxin signaling/transport (black, also for C13), meristem maintenance (blue, also for C13), and flowering (green); C8, ubiquitination/SUMOylation (orange) and transcriptional process (purple); C13, cell-cycle/chromatin regulation (pink). Data are normalized TPM values of three biological replicates shown as a log<sub>2</sub> fold changes, relative to either TS (D) or VG (E–G) stages.

See also [Figures S1](#) and [S2](#) and [Data S1](#) and [S2](#).

during early stages of inflorescence development and influences the expression of genes involved in core biological processes including translation and protein degradation. Through analysis of differentially expressed transcripts (DETs), we identified a bZIP and an ALOG transcription factor that repress flowering and modify spikelet number and architecture, providing new insights about the genes that act downstream of *Ppd-1* to control key agronomic traits.

## RESULTS

### Transcriptome analysis of early wheat inflorescence development

To investigate the influence of *Ppd-1* during early inflorescence development, we first analyzed the transcriptome of cv. Paragon (herein referred to as wild type [WT]), which is the genetic background of the NILs that contain photoperiod-insensitive and null alleles of *Ppd-1*.<sup>11,17,18</sup> We performed RNA-seq transcriptome analysis on developing inflorescences from field-grown plants

at four developmental stages: vegetative (VG), double ridge (DR), lemma primordium (LP), and terminal spikelet (TS). These stages were selected because they mark key events of the vegetative-to-reproductive transition, including the initiation of spikelet and floret development, and they are modified by allelic variation for *Ppd-1*.<sup>7,10,15,17,19</sup> Our analysis detected a similar number of transcripts at each of the four stages, based on a threshold value of >0.5 transcripts per million (TPM): 76,439 transcripts (64,550 unique genes, 54,227 high-confidence [HC] and 22,212 low-confidence [LC] transcripts) were expressed at VG, 77,215 at DR (65,070 unique genes, 53,787 HC and 23,428 LC), 79,240 at LP (66,567 unique genes, 55,435 HC and 23,805 LC), and 78,119 (66,097 unique genes, 54,717 HC and 23,402 LC) at TS ([Data S1](#)). The proportion of genes expressed from each genome was consistent across the four stages, with the A, B, and D genomes contributing approximately 33.5%, 30.5%, and 36% of the detected transcripts, respectively ([Figure 1A](#); [Data S1](#)). The stronger contribution of transcripts from the A and D genomes shown here is consistent with analyses of spike transcriptomes from Chinese Spring and Azhurnaya<sup>20</sup>; however, the bias toward the D genome of Paragon is stronger than that detected in the other genotypes.<sup>21,22</sup>

Having detected transcripts present at each stage, we asked how gene expression changed during early inflorescence development by identifying DETs between consecutive stages ([Figure 1B](#); [Data S2A](#)). We detected 3,562 and 5,423 transcripts

that were significantly up- and downregulated, respectively, between the VG and DR stages, 1,993 and 917 transcripts between DR and LP, and 1,219 and 1,035 transcripts between LP and TS ( $q < 0.05$ ). These results indicate there is a more pronounced change in the transcriptome during the vegetative-to-reproductive transition relative to later stages, and that inflorescence development involves coordinated repression and activation of gene expression.

To further investigate stage-specific changes in gene expression, we clustered the 30,000 most abundant transcripts based on their expression profiles across the four stages. The analysis identified 15 clusters with unique expression profiles that included 14,535 transcripts, with the remaining 15,465 transcripts falling into the non-clustered category (Figure S1; Data S2B). Among the clusters, we detected profiles that displayed specific up- or downregulation at each developmental stage (Figure 1C). For example, cluster 2 (C2) included 322 transcripts that peaked at VG, followed by significant downregulation at DR and remaining stages (Figure 1C; Data S2B). Gene ontology (GO) term analysis showed these transcripts were enriched for transcripts encoding proteins with transferase, catalytic, and protein serine/threonine kinase activity, including glucosyltransferases, sulfotransferases, and methyltransferases, and calcium-dependent and mitogen-activated protein kinases (Figures 1D and S2; Data S2C and S2D). Several C2 genes perform roles in cell wall biosynthesis, suggesting the vegetative-to-reproductive transition involves re-configuration of cell walls in the developing inflorescence.<sup>23,24</sup>

Cluster 5 (C5) contained 434 transcripts that peaked at DR, relative to VG, LP, and TS. C5 transcripts were enriched for GO terms involved in auxin-activated signaling, floral development, and DNA/RNA binding (Figures 1C, 1E, and S2; Data S2B, S2C, and S5). Auxin signaling genes included those involved in auxin transport (e.g., *PIN-FORMED*; *PIN*), regulation of auxin homeostasis (e.g., *Gretchen Hagen 3.5*; *GH3.5*), auxin-response factors (ARFs; e.g., *ARF1*, *ARF2*, *ARF3*, and *ARF5*), and homologs of Arabidopsis genes that respond to auxin (e.g., *IAA27*)<sup>25–29</sup> (Figures 1E and S2; Data S2D). These results indicate auxin plays an important role during the vegetative-to-reproductive transition and establishment of an inflorescence meristem or axillary meristems that will form spikelets, which is consistent with reports in maize and that auxin treatment modified wheat inflorescence architecture when applied during early reproductive stages.<sup>25,30</sup> Floral development transcripts included those with roles in meristem growth (e.g., *BARELY ANY MERISTEMS1*), differentiation of floral organs, and flowering-time regulation<sup>31–33</sup> (Figures 1E and S2; Data S2D). The profile of C5 transcripts was mirrored by those of C14, which displayed substantially lower expression at DR relative to the other stages (Figure 1C). C14 transcripts were enriched for genes encoding proteins with roles in chromatin assembly and organization (Data S2B and S2C), suggesting there may be a pause in chromatin remodeling at DR.

LP was defined by C8 and C0, which contained transcripts that were substantially up- or downregulated, respectively, relative to the other three stages; C0 and C8 contained the most transcripts of the 15 identified clusters (Figures 1C, 1F, S1, and S2; Data S2B and S2D). The 3,278 transcripts of C8 were enriched for ubiquitination/SUMOylation and transcription-related GO terms (Data S2B and S2C). For example, C8 transcripts

encode ubiquitin- and SUMO-conjugating enzymes, ubiquitin and SUMO E3 ligases, and components of the COP9 signalosome (CONSTITUTIVE PHOTOMORPHOGENESIS 9) and SCF (Skp, Cullin, F-box) complexes that facilitate protein degradation (Figures 1F and S2, Data S2C and S2D).<sup>34</sup> C8 also included transcripts encoding RNA polymerase subunits, components of the Mediator complex, and histone acetyltransferases (Figures 1F and S2; Data S2C and S2D). C9 transcripts shared a similar profile to C8 and included ubiquitin-related genes, supporting the idea that protein degradation is a core process of LP (Figure S1; Data S2B). The 5,176 transcripts of C0 were enriched for GO terms related to translation and RNA processing (Data S2C). Transcripts included those encoding small and large ribosome subunits, translation initiation and elongation factors, transfer RNA (tRNA) synthases and ligases, poly(A)-binding proteins, and pre-mRNA splicing factors (Figure S2; Data S2B and S2D). Along with the enrichment of ubiquitin-related genes in C8, these results indicate LP marks a key transition stage for transcript and protein turnover in the developing inflorescence.

C13 contained transcripts that were upregulated specifically at TS and were enriched for genes encoding proteins with roles in nuclear division, cell-cycle control, and inositol metabolism (Figures 1C, 1G, and S2; Data S2B–S2D). C13 transcripts also encode proteins that regulate cell proliferation and meristem maintenance and perform roles in auxin signaling and floral development (e.g., *PISTILLATA*; Figure 1G).<sup>35–40</sup> Together, the cluster analysis indicates that coordination of the reproductive transition and initiation of spikelet and floret development involves stage-specific up- and downregulation of genes that perform roles in diverse biological processes, including auxin signaling, meristem maintenance, floral development, transcription, and protein turnover.

### Photoperiod-1 regulates the transcriptome landscape of early inflorescence development

Having established a reference inflorescence transcriptome, we asked how allelic variation for *Ppd-1* influences gene expression. This analysis was performed using NILs that contain either the photoperiod-insensitive *Ppd-D1a* allele or loss-of-function alleles for *Ppd-1* on all three genomes (*ppd-1* null).<sup>11,17,18</sup> We detected a similar number of transcripts for each NIL across the four developmental stages as those identified in WT, with approximately 64,000–68,000 unique genes (53,000–56,000 HC and 23,000–24,000 LC) expressed in both genotypes during the four stages (Data S3 and S4). Similarly, the proportion of genes contributed by each genome remained stable (33.5%, 30.5%, and 36% from the A, B, and D genome), indicating *Ppd-D1a* alleles do not uniquely modify the D genome relative to the other two genomes (Figures 2A and 2B). Most transcripts that were differentially expressed ( $q < 0.05$ ) in the *Ppd-D1a* NIL, relative to WT, were detected during VG, LP, and TS (3,274/3,451; 94.9%; Figure 2C; Data S5), which is consistent with rapid onset of the reproductive transition and spikelet termination of photoperiod-insensitive lines. Interestingly, a higher proportion of DETs were downregulated (2,173/3,451; 63%), relative to those that were upregulated (1,278; 37%), indicating the accelerated inflorescence development and flowering of photoperiod-insensitive lines may be as much due to suppression of genes that maintain a vegetative state as the activation of transcripts

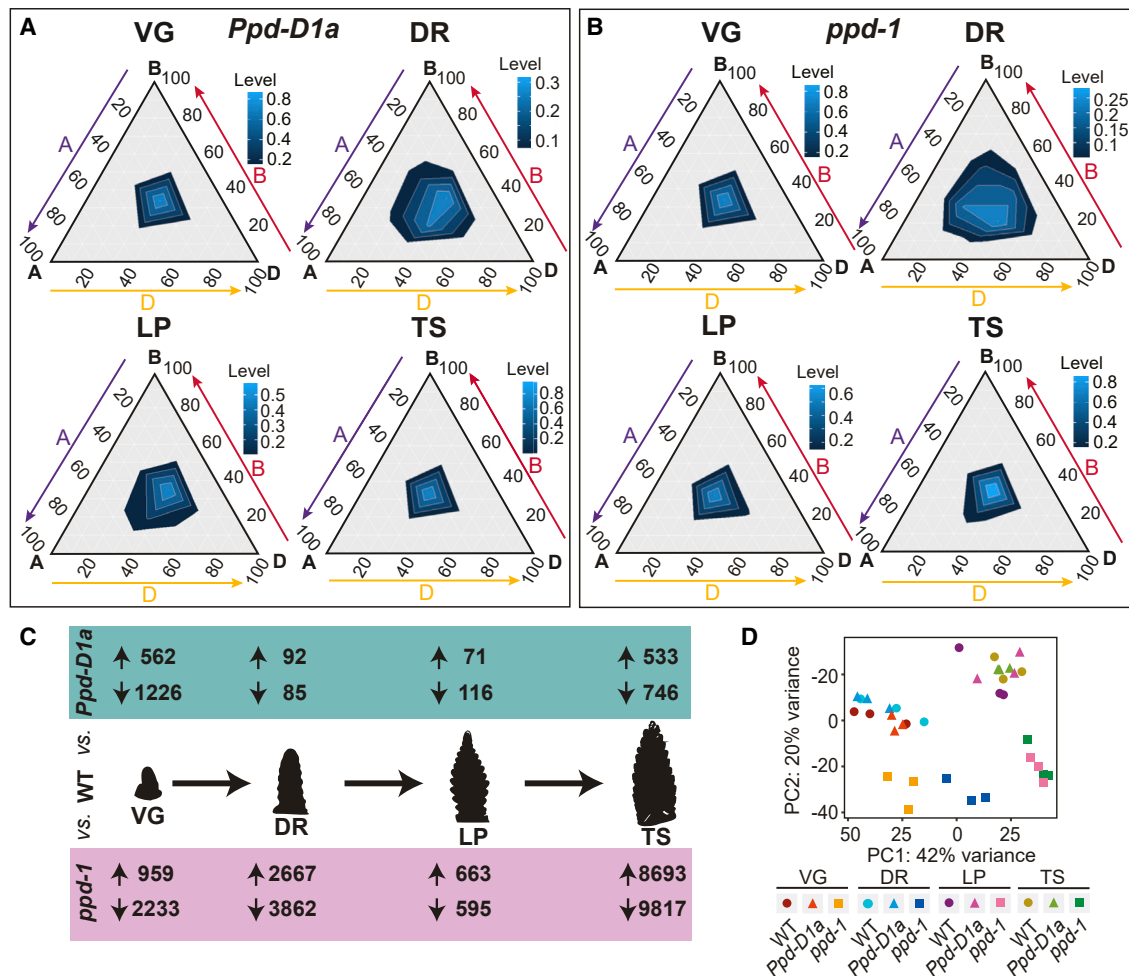

**Figure 2. *Ppd-1* allelism influences the transcriptome of early wheat inflorescence development**

(A and B) Ternary plots showing relative expression abundance of 21,627 gene triads during vegetative (VG), double ridge (DR), lemma primordium (LP), and terminal spikelet (TS) stages in photoperiod-insensitive (A, *Ppd-D1a*) and null (B, *ppd-1*) lines. Lighter shades of blue represent higher transcript density.

(C) A summary of transcripts that are significantly up- and downregulated between WT and the *Ppd-D1a* (green) and *ppd-1* (magenta) NILs at each of the four stages.

(D) Principal component analysis of transcript libraries from the three genotypes (WT, *Ppd-D1a*, and *ppd-1*) across all four stages, with each condition containing three replicates.

See also [Figures S2](#) and [S3](#) and [Data S1](#), [S2](#), [S3](#), [S4](#), and [S5](#).

that promote spikelet and floret development ([Figure 2C](#); [Data S5](#)). For the late-flowering *ppd-1* NIL, we found an equal proportion of DETs were up- (13,123/29,835; 44%) and downregulated (16,172; 56%), relative to WT, with a greater number of DETs (29,835) compared to the *Ppd-D1a* NIL (3,451; [Figure 2C](#); [Data S5](#)). A substantial proportion of the DETs (62%) were detected at TS, consistent with spikelet development terminating later in *ppd-1*, compared to WT. The higher number of DETs in *ppd-1* was supported by principal component analysis, which showed *ppd-1* libraries at each stage clustered away from those of WT and the photoperiod-insensitive NIL ([Figure 2D](#)). Similarly, comparisons to WT clusters showed fewer transcripts exhibited the same profile in *ppd-1* (640 transcripts), relative to those expressed in *Ppd-D1a* (838 transcripts), and gene-network analysis showed that no transcripts shared the same profile as

*Ppd-B1* and *Ppd-D1* in the *ppd-1* NIL, unlike WT and the photoperiod-insensitive line, where multiple genes are co-expressed with *Ppd-B1* (827 and 1,846 genes, respectively) and *Ppd-D1* (827 and 2,383 genes, respectively; [Figure S3](#); [Data S2B](#) and [S2E–S2G](#)). Together, these results indicate genetic variation for *Ppd-1* substantially modifies the transcriptome of early inflorescence development in wheat, and that absence of Ppd-1 function has a more pronounced effect than photoperiod-insensitive alleles.

Next, we asked how *Ppd-1* expression in the inflorescence changed in the two NILs, relative to WT. In the photoperiod-insensitive line, *Ppd-B1* and *D1* expression increased significantly at TS, relative to WT, while *Ppd-A1* transcript levels were similar ([Figure S3](#)). In *ppd-1*, *Ppd-D1* was upregulated like it is in the leaf, indicating *Ppd-D1* expression responds to

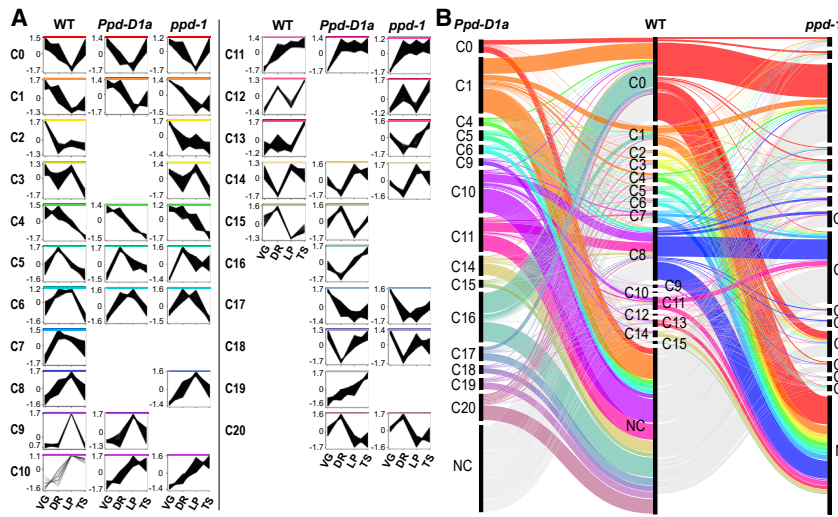

**Figure 3. Photoperiod-insensitive and null alleles of *Ppd-1* modify stage-specific expression of transcripts during wheat inflorescence development**

(A) A comparison of the transcript clusters detected in WT, photoperiod-insensitive (*Ppd-D1a*), and null (*ppd-1*) lines across early stages of inflorescence development (VG, DR, LP, and TS). Clusters include the 30,000 most abundant transcripts, and each cluster contains at least 20 genes.

(B) An alluvial plot demonstrating the shift in transcript expression profiles of *Ppd-D1a* and *ppd-1* lines, relative to WT—the cluster numbers and colors correspond to those shown in (A), and line thickness indicates transcript numbers. NC, no cluster; transcripts do not alter during the analyzed stages.

See also [Figure S3](#) and [Data S1, S2, S3, S4, and S5](#).

absence of *Ppd-B1* ([Figure S3](#)).<sup>10</sup> Expression of *Ppd-A1* remained low in *ppd-1*, and there were no *Ppd-B1* transcripts. Thus, *Ppd-1* is expressed in the developing inflorescence, and variant *Ppd-1* alleles influence expression of their homeologs during inflorescence development.<sup>10,15</sup>

To further investigate the influence of *Ppd-1* on stage-specific gene expression, we asked how insensitive and null alleles modify the transcript clusters detected in WT. Of the 15 clusters, 10 and 13 comparable clusters were identified in the *Ppd-D1a* and *ppd-1* NILs, respectively ([Figure 3A](#); [Data S2E](#) and [S2F](#)). A substantial proportion of genes that did not cluster in WT formed distinct profiles in the *Ppd-D1a* and *ppd-1* lines (57.7% and 49.5%, respectively), such that 15 and 17 unique clusters were detected in the photoperiod-insensitive and null NIL, respectively ([Figure 3](#)). Regarding stage-specific clusters, transcripts of C2 were expressed lower at VG in the photoperiod-insensitive line, relative to WT, such that genes were not downregulated at DR, indicating a shift of *Ppd-D1a* VG inflorescences toward being more like DR of WT. In the null line, most C2 transcripts showed a similar profile to WT but were expressed less at VG, with multiple transcripts shifted to the non-clustered category for *ppd-1* ([Figures 3B](#) and [S2](#); [Data S2D](#)). The advanced progression of inflorescence development in the photoperiod-insensitive line was supported by analysis of transcripts from C5 of WT, where transcripts peaked specifically at DR; many transcripts displayed strong VG expression in the *Ppd-D1a* NIL ([Figures 3B](#) and [S2](#); [Data S2D](#)). In *ppd-1*, many C5 transcripts displayed a similar profile to WT but were either up- or downregulated, with *BAM*, *ARF2*, *GH3.5/6*, and *PIN* expressed higher in *ppd-1* than WT, while fewer *ARF3* and *ARF5* transcripts were detected ([Figures 3B](#) and [S2](#); [Data S2D](#)).

The genotype-dependent shifts in expression profiles relative to development continued during later stages ([Figure 3B](#)). For example, C8 transcripts encoding proteins with roles in ubiquitination/SUMOylation peaked earlier at DR in *Ppd-D1a*, with some sustaining expression through to TS ([Figure S2](#); [Data S2D](#)). In *ppd-1*, transcripts encoding SUMOylation and ubiquitination proteins peaked earlier at DR and dipped at LP, except for ubiquitin E3 ligases, which climaxed at LP but were more abundant in *ppd-1*

than WT. Similarly, transcripts encoding proteins that perform roles in transcription peaked earlier at DR and to lower levels in the photoperiod-insensitive line, relative to WT, while these transcripts climaxed at DR or TS in *ppd-1*. For C0 genes that were downregulated at LP, transcripts encoding ribosomal proteins did not fall at LP in the photoperiod-insensitive line as much as they did in WT, nor did they show strong upregulation at TS ([Figure S2](#); [Data S2D](#)). In *ppd-1*, transcripts encoding ribosome subunits dropped between VG and DR and continued to fall through LP and TS. Similar trends were observed for genes encoding eukaryotic translation initiation factors, poly(A)-binding proteins, and cap-binding proteins. C0 genes encoding splicing factors displayed stable expression between DR and TS in *Ppd-D1a*, with no drop at LP, while these transcripts were stable between DR and LP in *ppd-1* but trended downward at TS, which is opposite to WT ([Figure S2](#); [Data S2D](#)). At TS, C13 transcripts that encode proteins involved in nuclear division and cell-cycle control, auxin signaling, and meristem maintenance dipped earlier at DR in *Ppd-D1a*, rather than at LP as they did in WT, but they maintained a peak at TS ([Figure S2](#); [Data S2D](#)). In *ppd-1*, these transcripts peaked at LP rather than TS. Taken together, these data indicate *Ppd-1* substantially influences stage-specific expression of transcripts during inflorescence development, with gene expression profiles shifting earlier in the photoperiod-insensitive line, relative to WT, while they are often delayed or reduced in *ppd-1*.

### ***Ppd-1* is required for correct expression of spikelet development genes**

To investigate the effect of *Ppd-1* on the activity of genes that influence spikelet and floret formation, we examined transcripts encoding MADS-box transcription factors, including genes that regulate spikelet architecture and floral development<sup>41–46</sup> ([Figure 4A](#); [Data S2H](#)). Transcripts of these genes grouped into eight clusters in WT, with each resolving largely into functional classes of floral development ([Figure 4A](#)). Two clusters identified transcripts encoding APETALA1-like (*VRN1*, *AP1-2*, and *AP1-3*) and SEPALLATA-like (*SEP1* and *SEP3*) transcription factors of the A and E classes, which are expressed at a relatively low level during VG before rising during DR and LP.<sup>44,45,47</sup> Transcripts of E

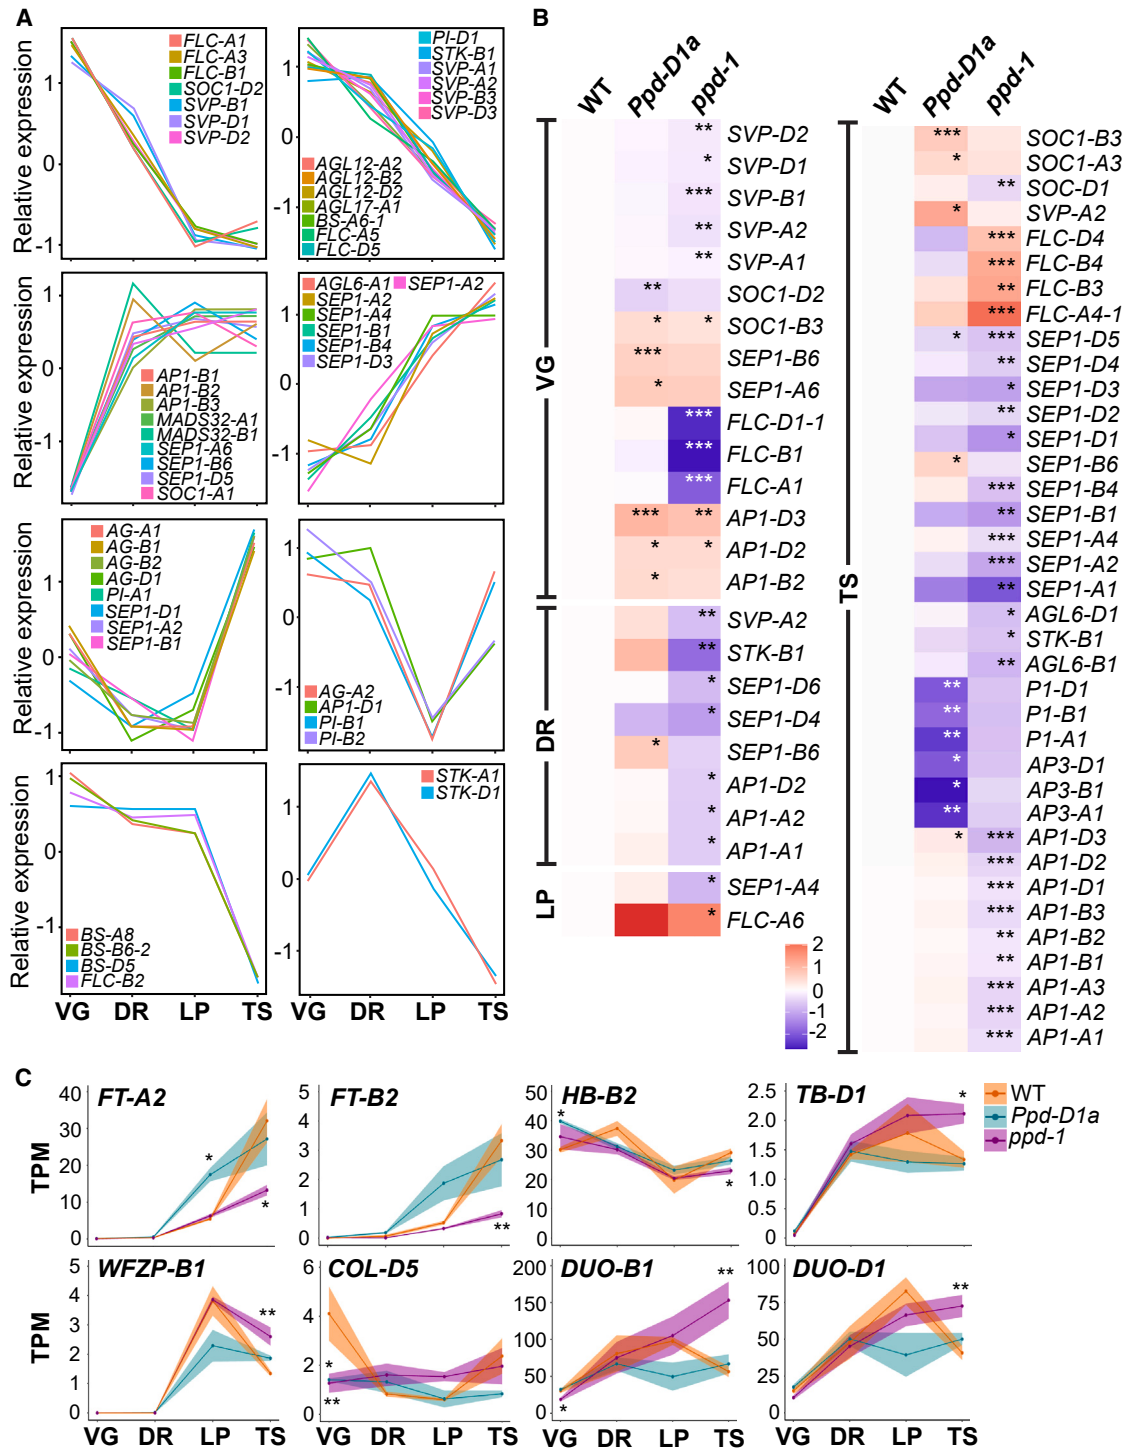

**Figure 4. *Ppd-1* influences the expression of transcripts encoding genes that regulate spikelet and floret development**

(A) Eight clusters of transcripts encoding MADS-box transcription factors that are expressed during the vegetative (VG), double ridge (DR), lemma primordium (LP), and terminal spikelet (TS) stages of wheat inflorescence development.

(B) Heatmaps display transcripts of MADS-box transcription factors that are expressed differentially during each of the four analyzed stages of inflorescence development. Data are normalized TPM values of three biological replicates shown as log<sub>2</sub> fold changes, relative to WT.

(C) Transcript profiles of genes that regulate spikelet architecture and number, which are expressed differentially in either *Ppd-D1a* (cyan) or *ppd-1* (magenta) NILs, relative to WT (orange). Data are presented as ribbon plots that show transcript levels (TPM, solid line with data points) ± SEM (shaded region) of three biological replicates. \**p* < 0.05; \*\**p* < 0.01; \*\*\**p* < 0.001.

See also Figure S4 and Data S1, S2, S3, and S4.

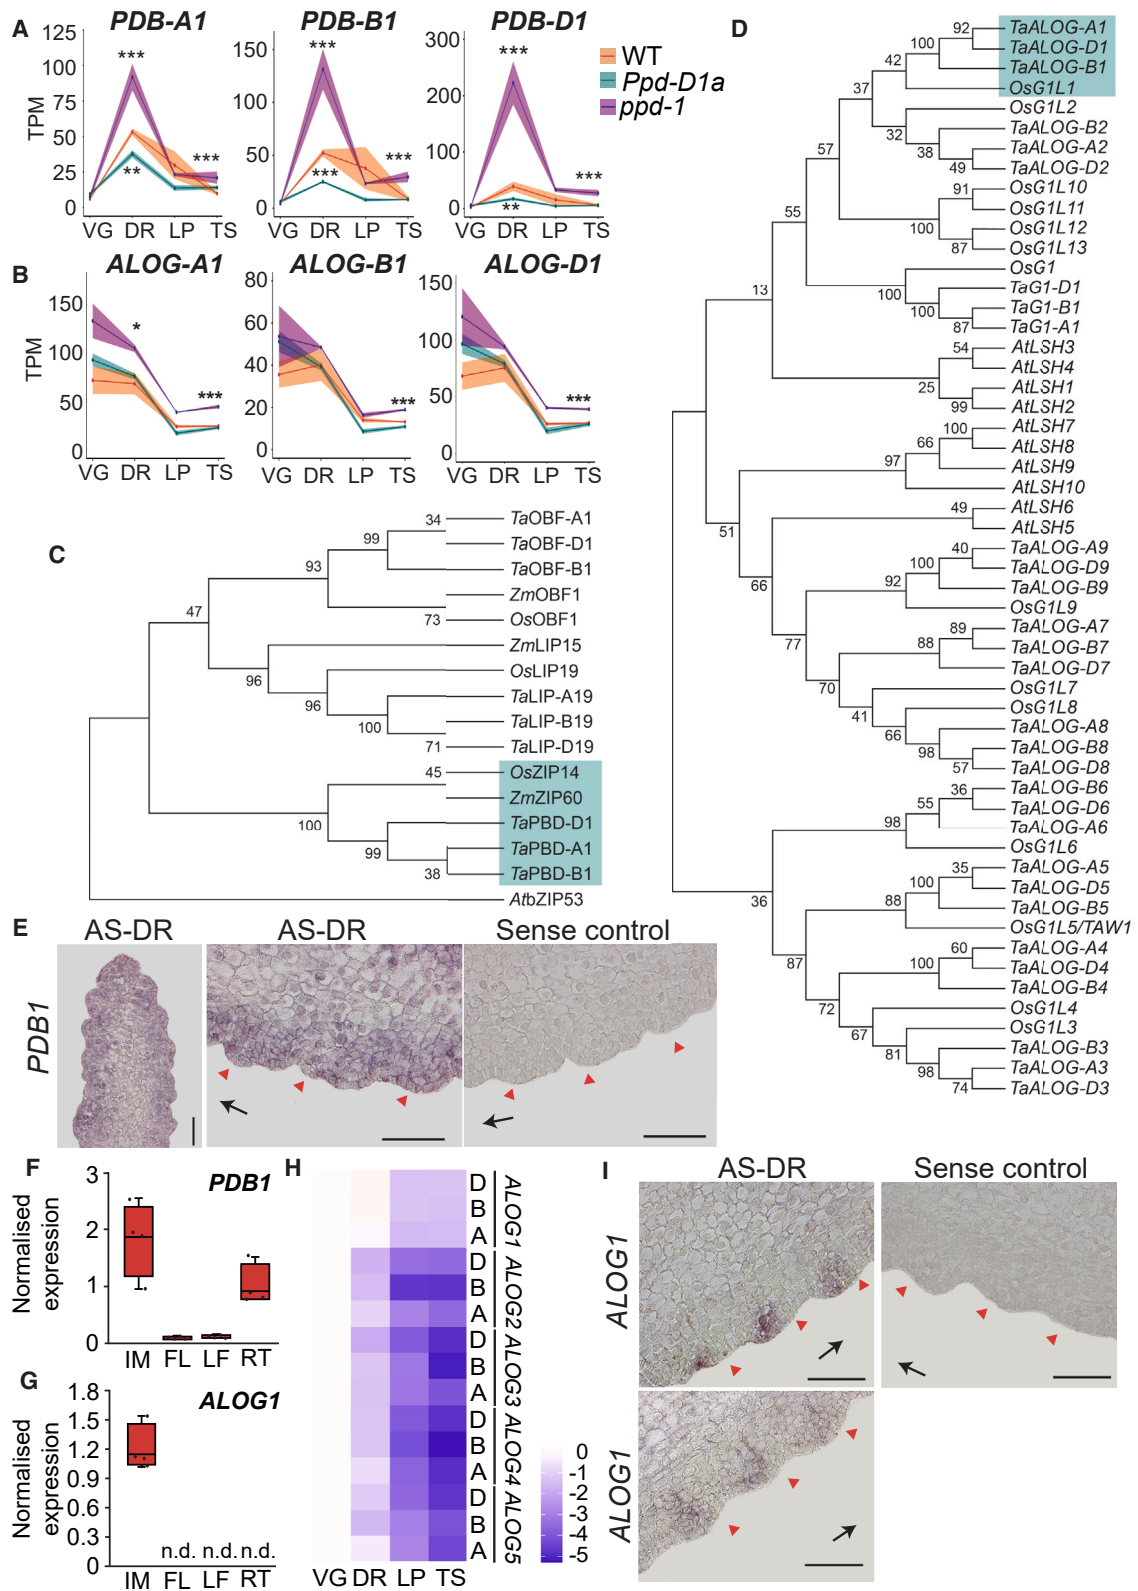

(legend on next page)



class *SEP3-like* genes were expressed at a low level until LP, before increasing significantly at TS. Two independent clusters included the *AG-like* and *PI-like* genes of the B and C classes, for which expression decreased between VG and LP, before increasing again at TS. Transcripts encoding the D class transcription factors were represented by two clusters: expression of the *STK-like* and *AGL12* genes peaked at DR before declining during LP and TS, while *ALG6* was expressed at a low level from VG to LP before peaking strongly at TS. Transcripts of *Bsister-like* genes peaked at VG and DR, before reducing significantly during the LP and TS stages,<sup>42</sup> and those encoding SHORT VEGETATIVE PHASE (SVP) and FLOWERING LOCUS C (FLC) transcription factors peaked at VG before falling during successive stages (Figure 4A).<sup>41,43,46,48</sup>

Given earlier analyses showed that *AP1-* and *SEP1-like* genes are downregulated in inflorescences of *ppd-1* mutants, we predicted that multiple genes encoding MADS-box transcription factors would be mis-regulated in the null and photoperiod-insensitive lines.<sup>10,15</sup> Consistent with previous studies, *AP1-*, *SEP1-*, and *SUPPRESSOR OF CONSTANS1-like* (*SOC1*) genes were significantly downregulated at TS in *ppd-1*, relative to WT (Figures 4B and S4; Data S2H and S2I).<sup>15</sup> Significantly fewer transcripts were detected for homeologs of *SVP* (*SVP1* and *VRT2*) and *FLC1* at VG in *ppd-1*, relative to WT, while substantially more transcripts were detected for *FLC3*, *FLC4*, and *FLC6* at LP or TS (Figures 4B and S4; Data S2H and S2I). For other MADS-box genes, the level and profile of transcripts were maintained in *ppd-1*, relative to WT, despite *FT1* being expressed significantly lower in the null line (Data S2H and S2I).<sup>10</sup> In the photoperiod-insensitive line, expression of *AP1-2*, *AP1-3*, and *SEP1-6* was significantly higher at VG or TS, relative to WT, as were homeologs of *VRT2* and *SOC1-3* (Figures 4B and S4; Data S2H and S2I). However, no other MADS-box genes were significantly upregulated at DR or LP (Data S2I). *PI*, *AP3-1*, and *FLC4* were downregulated significantly at TS in the photoperiod-insensitive line, relative to WT, consistent with the cluster analysis. These results indicate photoperiod-insensitive *Ppd-1* alleles do not increase transcript levels of multiple MADS-box genes, relative to WT, even though *FT1* is expressed significantly higher in these genotypes. Gene-network and comparative transcript analyses indicate that the effect of the *Ppd-D1a* allele, instead, is to shift the pattern of expression of transcription factors that perform roles in spikelet and floret development, with 14 MADS-box genes being co-expressed with *Ppd-D1* in the photoperiod-insensitive NIL that were not detected to be so in WT inflorescences (Figure S3; Data S2G). In

*ppd-1*, transcripts of multiple MADS-box genes were dampened or delayed relative to WT (Figure S4; Data S2H). Together, these results indicate *Ppd-1* is required for robust expression of meristem identity genes, and photoperiod-insensitive alleles affect activity of MADS-box genes by modifying the seasonal timing of expression, rather than altering transcript levels.<sup>10</sup>

Next, we asked how *Ppd-1* influences genes that regulate spikelet architecture and number. Transcripts of spikelet architecture genes, including *TEOSINTE BRANCHED-D1* (*TB-D1*), *DUO-B1*, *DUO-D1*, and *WHEAT FRIZZY PANICLE-B1* (*WFZP-B1*), were significantly higher in *ppd-1* at TS relative to WT, as were those of *DUO-B1* at VG; however, no significant differences were detected for *HB-2* (all homeologs), *TB-A1*, *TB-B1*, *DUO-A1*, *WFZP-A1*, and *WFZP-D1* (Figure 4C; Data S2H).<sup>49–53</sup> In the photoperiod-insensitive line, only *HB-B2* was significantly different, with more transcripts detected at VG relative to WT. Regarding spikelet number genes, transcripts of *FLOWERING LOCUS T-A2* (*FT-A2*) and *FT-B2* were significantly downregulated in *ppd-1* at TS, relative to WT, while *FT-A2* transcripts were significantly upregulated in the *Ppd-D1a* NIL at LP (Figure 4C; Data S2H).<sup>10,54–56</sup> *COL-D5* was significantly downregulated in both the photoperiod-insensitive and null lines at VG, while *COL-B5* and *WAPO1* homeologs were expressed similarly in all three genotypes. Together, these results indicate *Ppd-1* is required for correct expression of genes that control spikelet development, and that identification of transcripts mis-regulated in *ppd-1* could help discover genes that regulate spikelet number and architecture.

### PDB1 and ALOG1 regulate inflorescence architecture and flowering time

To investigate genes influenced by *Ppd-1* allelism that regulate inflorescence architecture, we analyzed the top 100 most significant DETs in the *Ppd-D1a* and *ppd-1* NILs relative to WT (Data S5). We identified two genes for which expression of all three homeologs was modified in the NILs (Figures 5A and 5B). These genes included *TraesCS6A02G096300*, *TraesCS6B02G124700*, and *TraesCS6D02G087400*, which encode a basic-leucine zipper (bZIP) transcription factor, and *TraesCS6A02G139700*, *TraesCS6B02G168300*, and *TraesCS6D02G129400*, which encode an ALOG domain (Arabidopsis LSH1, Oryza G1) transcription factor.

Phylogenetic analysis showed the bZIP gene encodes a group S bZIP transcription factor homologous to bZIP60 of maize (*Zea mays*) and bZIP11/14 of rice (*Oryza sativa*); other members include LIP19 and OBF-1 (ocs-element binding factor-1; Figure 5C; Data S2J). Given the inconsistent naming of rice (either

### Figure 5. Identification of PDB1 and ALOG1 as transcription factors influenced by Ppd-1 allelism

(A and B) *PDB1* (A) and *ALOG1* (B) homeolog expression is influenced by photoperiod-insensitive (*Ppd-D1a*, cyan) and null (*ppd-1*, magenta) alleles of *Ppd-1*, relative to WT (orange), during early inflorescence development. Data are presented as ribbon plots that show transcript levels (TPM, solid line) ± SEM (shaded region) of three biological replicates.

(C and D) Unrooted maximum-likelihood phylogenetic trees of (C) group S bZIP and (D) ALOG transcription factors from wheat (*Ta*), rice (*Os*), maize (*Zm*), and Arabidopsis (*At*). Branches containing *PDB1* and *ALOG1* are highlighted in green.

(E–I) Expression analysis of *PDB1* and *ALOG1*, including (E) *in situ* hybridization of *PDB1* (AS, anti-sense; DR, double ridge stage) and tissue-specific expression analysis of (F) *PDB1* and (G) *ALOG1* in inflorescence (IM), flag leaf (FL), emerging leaves (LF), and roots (RT) of WT. Data are the average ± SEM of four biological replicates. In the boxplot, each box is bound by the lower and upper quartiles, the central bar represents the median, and the whiskers indicate the minimum and maximum values. Individual data points are shown; n.d., not detected. (H) A heatmap showing transcript levels of homeologs for ALOG transcription factors with TPM > 5 in at least one stage and (I) *in situ* hybridization of *ALOG1*. Red arrows indicate spikelet primordia and black arrows indicate direction of inflorescence apex. \*\**p* < 0.01; \*\*\**p* < 0.001. Scale bars, 100 μm (E and I).

See also Figure S3 and Data S1, S2, S3, and S4.

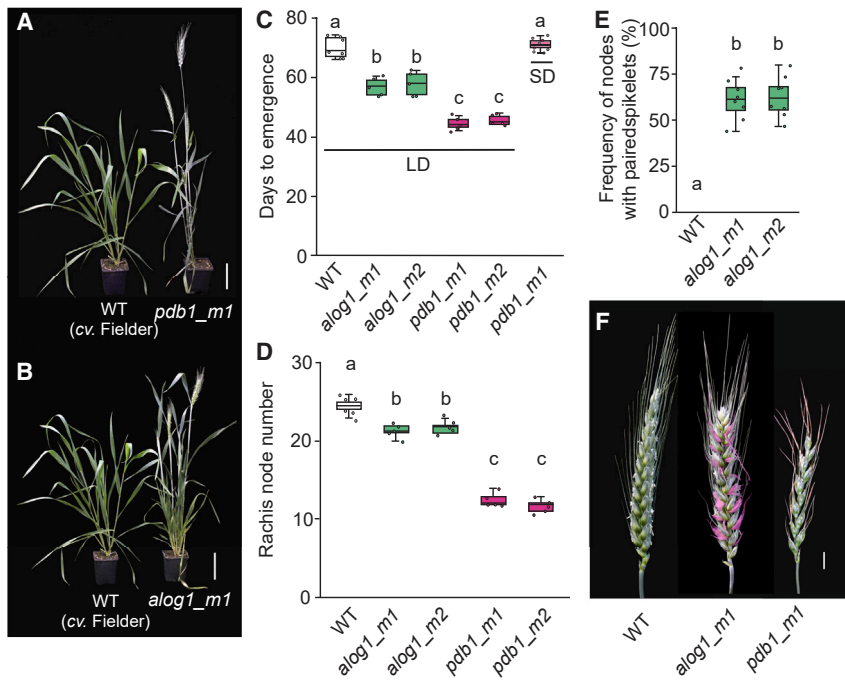

**Figure 6. PDB1 and ALOG1 influence flowering time and inflorescence architecture**

(A–C) The *pdb1* (A and C) and *alog1* (B and C) gene-edited lines flower earlier than WT (cv. Fielder) under long days (LD) and *pdb1\_m1* flowers rapidly under short days (SD).

(D–F) Analysis of spikelet number and architecture phenotypes in the *pdb1* (pink) and *alog1* (green) lines, relative to WT (white). The secondary spikelets of *alog1\_m1* are highlighted in pink.

In the boxplots (C–E), each box is bound by the lower and upper quartiles, the central bar represents the median, and the whiskers indicate the minimum and maximum values of 4–5 biological replicates. Boxes that do not share a lowercase letter in the plots indicate a significant difference,  $p < 0.001$ .

See also Figures S5 and S6.

*ALOG1* expression peaked at VG and DR (cluster C1) and was lower at LP and TS; of the highly expressed ALOG transcription factors, *ALOG1* is the only member that is expressed equally or higher at DR as VG, with transcripts encoding the other ALOG genes being substantially lower at DR, relative to VG (Figures 5B,

bZIP11 or bZIP14) and maize (bZIP60) homologs, we named the wheat gene based on the molecular phenotype of it being a *photoperiod-1-dependent bZIP transcription factor*, or *PDB1* (homeologs: *PDB-A1*, *PDB-B1*, and *PDB-D1*). The gene network analysis supported *PDB1* as being regulated by *Ppd-1* in WT, as *PDB-B1* and *-D1* were detected in the same sub-network as *Ppd-D1* (Figure S3; Data S2G). ALOG-domain transcription factors include the LIGHT-DEPENDENT SHORT HYPOCOTYL (LSH) proteins of Arabidopsis and OsG1-like proteins of rice.<sup>57–59</sup> The wheat sequence identified here is orthologous to OsG1L1 (Figure 5D); we named the wheat gene *TaALOG1* (homeologs named *ALOG-A1*, *ALOG-B1*, and *ALOG-D1*) to be consistent with the wheat gene nomenclature guidelines, with the other members named *TaALOG2* to *TaALOG9* and *TaGL1* (*G1-Like-1*; Data S2K).<sup>60</sup> *ALOG1* was the only member for which all three homeologs were mis-regulated in the *Ppd-1* NILs; *G1-A1* transcripts were lower in *Ppd-D1a* inflorescences at TS, while *ALOG-A3* (DR), *ALOG-A4* (VG), and *ALOG-A5* (VG) transcripts were higher in *ppd-1* (Data S2K).

In WT, *PDB1* expression increased significantly between VG and DR, before declining at LP and remaining low at TS; *PDB1* grouped with cluster C7 (Figure 5A; Data S2B and S2J). As well as being expressed in developing inflorescences, where transcripts were detected throughout the inflorescence, *PDB1* transcripts were detected by qRT-PCR in root tips, but not in leaves (Figures 5E and 5F). *PDB-A1* and *PDB-B1* were expressed comparably and higher than *PDB-D1*, consistent with public transcriptome data (Figure 5A).<sup>20,61</sup> Stage-wise *PDB1* expression profiles were maintained in both NILs; however, in *ppd-1*, all three *PDB1* homeologs were expressed significantly higher at DR and TS, relative to WT, and there were significantly fewer transcripts in the photoperiod-insensitive line at DR (Figure 5A; Data S2J). Together, these results indicate *Ppd-1* suppresses *PDB1* expression, particularly at DR.

5G, and 5H; Data S2B and S2K). qPCR indicated *ALOG1* is expressed exclusively in the developing inflorescences, and *in situ* hybridization localized transcripts to the lower region of the lateral meristem that subtends the spikelet primordia; no transcripts were detected in root tips or leaves, consistent with public transcriptome data (Figures 5G and 5I).<sup>20,61</sup> *ALOG-A1* and *-D1* were expressed comparably and higher than *ALOG-B1* (Figure 5B). The profile of each *ALOG1* transcript was maintained in the two NILs, but *ALOG-A1* was expressed significantly higher in the null line at DR and TS, and *ppd-1* contained more *ALOG-B1* and *-D1* transcripts at TS, relative to WT (Figure 5B; Data S2K). Upregulation of *ALOG1* in the *ppd-1* NIL was not mirrored by downregulation in the photoperiod-insensitive line, indicating *Ppd-1* negatively regulates *ALOG1* expression but does not cause further suppression when expressed constitutively.

Based on the *Ppd-1*-dependent expression profiles of *PDB1* and *ALOG1*, we hypothesized that lines carrying mutations in these genes would display spikelet and/or flowering-time phenotypes. To test this hypothesis, we generated CRISPR/Cas9 gene-edited lines for *PDB1* and *ALOG1* in the cultivar Fielder (Figure 6); no deleterious mutants were detected for these genes in the Cadenza TILLING population. The *PDB1* gene-edited lines (*pdb1\_m1* and *pdb1\_m2*) contain deletions in *PDB-B1* (31 bp) and *PDB-D1* (30 bp) or *PDB-A1* (30 bp) and *PDB-D1* (30 bp), while those of *ALOG1* (*alog1\_m1* and *alog1\_m2*) carry deletions in each of *ALOG-A1* (2 bp + 2 bp, or 2 bp), *ALOG-B1* (3 bp), and *ALOG-D1* (58 bp + 1 bp, or 1 bp); edits in each gene render transcripts that encode proteins with premature stop codons or lack amino acids that are highly conserved in ALOG transcription factors (Figure S5). To test the effect of these mutations on flowering time and inflorescence architecture, we grew the lines under long days (16 h light/8 h dark). Flowering time was accelerated by approximately 25 days in the *PDB1* mutants ( $44.4 \pm 0.9$  and  $45.6 \pm 0.8$  days after germination [DAG]) relative to WT

(71.5 ± 4.1 DAG), while flowering occurred approximately 13 days earlier in the *alog1* mutants (56.8 ± 1.2 and 57.8 ± 1.7 DAG; Figures 6A–6C). Both *pdb1* and *alog1* mutants produced inflorescences with significantly fewer rachis nodes relative to WT, and the *alog1* lines formed multiple paired spikelets (Figures 6D–6F); paired spikelets are composed of two spikelets at one rachis node, where a secondary spikelet forms immediately below the regular primary spikelet.<sup>15</sup> The secondary spikelets of *alog1\_m1* formed predominantly in the central region of the inflorescence (Figure S6). Many secondary spikelets formed fertile florets, such that *alog1\_m1* produced significantly more grain per inflorescence than WT, while *pdb1\_m1* formed significantly fewer grains per inflorescence (Figure S6). The grains of *alog1\_m1* and *pdb1\_m1* were of similar size and weight to WT, while the grains from secondary spikelets of *alog1\_m1* plants were smaller and lighter than those of primary spikelets (Figure S6). Given the *pdb1* lines reproduced the flowering time and spikelet phenotypes of photoperiod-insensitive wheat, we asked if *pdb1\_m1* flowers under non-inductive short-day conditions (SD).<sup>1,10,15</sup> Remarkably, *pdb1\_m1* displayed photoperiod insensitivity by flowering under extreme short daylengths (8 h light/16 h dark); neither WT nor *alog1\_m1* flowered under these conditions (Figure 6C). The *pdb1\_m1* line produced 13.4 ± 0.27 spikelets under SD, indicating the termination of spikelet development also occurred rapidly under these conditions. Together, these results demonstrate that flowering time, spikelet number, and inflorescence architecture can be altered by modifying the function of Ppd-1-dependent genes expressed in the inflorescence.

## DISCUSSION

Our transcriptome analysis shows that inflorescence development involves the coordinated up- and downregulation of gene expression as spikelet and floret development initiates. Recent evidence indicates that correct regulation of gene expression during inflorescence development is required to produce a wheat spike of the correct form. For example, failure to suppress *VRT2* and *SVP1* after DR causes abnormal floral organ growth and reduced spikelet fertility, while upregulation of *VRN1*, *FUL2*, and *FUL3* during early stages is required to complete spikelet meristem development and prevent paired spikelet formation.<sup>15,41,43,44,46</sup> Our cluster analysis indicates that stage-specific regulation of gene expression may also influence the timing of key biological processes that coordinate inflorescence development. For example, DR was enriched for genes involved in auxin transport and signaling, indicating this stage is important for the establishment of auxin maxima that initiate axillary meristem formation; these results are consistent with auxin transport helping to define boundary regions between lateral meristems of maize inflorescences and with auxin treatment disrupting spikelet formation when applied to immature wheat inflorescences.<sup>25,30</sup> At LP, we detected increased expression of ubiquitin/SUMOylation- and transcription-related genes and suppression of genes involved in translation and RNA processing. These results suggest LP is a key transition stage that involves protein turnover; our previous analyses support LP marking an important transition stage of wheat inflorescence development, as it aligns with a substantial increase of *FT1* and the detection of

differences in spikelet number.<sup>10</sup> We propose that stage-specific regulation of genes at DR and LP is required to define the number and arrangement of spikelets that form on a wheat inflorescence—this conclusion is consistent with spikelet number genes such as *WAPO1*, *DUO1*, and *FT2* shifting their expression at LP.<sup>10,53–55</sup>

Our analysis showed that *Ppd-1* influences gene expression substantially during early inflorescence development and contributes to both the activation and suppression of transcripts during inflorescence development. Analysis of transcripts detected within clusters showed that, in general, gene expression profiles shift to occur earlier in the photoperiod-insensitive line, relative to WT, while they are often delayed or dampened in the absence of Ppd-1 function. The principal component, network, and differential transcript analyses showed that loss of Ppd-1 function has a more pronounced effect on the developing inflorescence transcriptome than the *Ppd-D1a* allele, which is consistent with *ppd-1* plants displaying more severe inflorescence architecture phenotypes than photoperiod-insensitive lines.<sup>11,15,17,18</sup> In support of these trends, transcripts encoding proteins that influence spikelet number (e.g., *FT2*, *COL5*), architecture (e.g., *TB1*, *WFZP*), and fertility (e.g., *SVP1*, *VRT2*) are expressed differentially more often in the *ppd-1* null than the photoperiod-insensitive line, relative to WT.<sup>10,43,49,51,52,55,56</sup> Similarly, more MADS-box genes are mis-expressed in *ppd-1* than in the *Ppd-D1a* NIL, contrary to our expectations that higher *FT1* expression in the *Ppd-D1a* NIL would boost transcripts of genes that promote spikelet and floret development.<sup>15</sup> Taken together with seasonal expression analysis of *FT1* in these genotypes, our transcriptome and gene network data indicate that photoperiod-insensitive *Ppd-1* alleles promote early flowering and termination of spikelet development by accelerating the onset of expression for MADS-box and spikelet identity genes in the developing inflorescence (e.g., *SEP4*- and *AP1-like* genes), rather than increasing transcript levels.<sup>10</sup> This information suggests the productivity of photoperiod-insensitive genotypes could be enhanced by delaying or extending the duration of MADS-box gene expression—such an approach is supported by prolonged and higher expression of *AP1-like* genes increasing the yield potential of maize.<sup>62</sup>

Our analysis of transcripts expressed differentially in developing inflorescences of photoperiod-insensitive and *ppd-1* lines identified two flowering-time repressors, *PDB1* and *ALOG1*, which regulate spikelet number and architecture. Mutations in *PDB1* facilitated early and photoperiod-insensitive flowering and the formation of inflorescences with fewer spikelets. The *pdb1* mutants, therefore, reproduce flowering time and spikelet number traits of *Ppd-D1a* genotypes, consistent with *PDB1* being downregulated in the photoperiod-insensitive NIL.<sup>10,15,18,63</sup> The photoperiod insensitivity indicates flowering can be induced under short days by altering the activity of a gene expressed in the developing inflorescence, which is unique from early flowering being promoted by upregulating *FT1* expression in leaves.<sup>1,10,18</sup> The formation of fewer spikelets is consistent with other early flowering genotypes and indicates that spikelet development terminates earlier in *pdb1* mutants, relative to WT.<sup>1,10,17,64</sup> Interestingly, a group C bZIP transcription factor expressed similarly to *PDB1* reduces spikelet number in tetraploid wheat but does not accelerate flowering.<sup>65</sup> While the production of fewer spikelets is not favorable for breeding high-yielding

cultivars, the accelerated flowering provides an opportunity to generate rapid maturing varieties that suit multiple cropping farming systems.<sup>66</sup> The *alog1* mutants also flowered earlier than WT under long daylengths and produced inflorescences with fewer rachis nodes. These phenotypes are consistent with *ALOG1* being expressed lower in the *Ppd-D1a* NIL, relative to WT, and higher in the late-flowering *ppd-1* line. In addition, the *alog1* mutants produced paired spikelets, with multiple secondary spikelets forming fertile florets. Development of paired spikelets in an early flowering genotype is surprising because other secondary spikelet-producing genotypes flower simultaneously or later than WT siblings, and strong floral-promoting signals can reduce paired spikelet formation.<sup>15,49,50</sup> Together with it being expressed below the spikelet primordia, we propose that *ALOG1* helps define the region of a lateral meristem that will form a spikelet, such that a single spikelet forms rather than a pair. Indeed, such a role is consistent with the function of *ALOG1* and *ALOG2* in barley, in which *alog1/2* mutants form extra spikelets comparable to the secondary spikelets of *alog1* wheat mutants.<sup>67</sup> The striking similarity of paired spikelet development in the wheat and barley *alog1* mutants provides a unique example where a modified spikelet phenotype is shared in these two members of the Triticeae tribe, indicating *ALOG1* performs a conserved role in maintaining the unbranched form of a spike inflorescence. *ALOG* transcription factors, including G1L1, G1L2, and TAWAWA1, have been investigated in rice, and although loss-of-function mutants produce fewer secondary branches than WT, which contrasts the formation of supernumerary spikelets in wheat and barley, the proposed role of these proteins as maintainers of inflorescence meristem activity and suppressors of spikelet meristem identity may explain phenotypes of the wheat and barley mutants.<sup>57,59</sup> For example, perturbed maintenance of inflorescence meristems may help accelerate the onset of spikelet termination and reduce rachis nodes, while impaired suppression of spikelet meristems would facilitate secondary spikelet outgrowth. Further work is required to define the roles of PDB1 and *ALOG1* during inflorescence development; nonetheless, our research highlights the potential to identify genes that regulate flowering and spikelet architecture by comparing the inflorescence transcriptomes of lines with modified *Ppd-1* activity.

In summary, our data provide important insights into genes and biological processes that act downstream of *Ppd-1* in the developing inflorescence, which can be modified to change spikelet number, architecture, and flowering time. Given the frequent use of photoperiod-insensitive *Ppd-1* alleles in global wheat breeding, this information introduces genetic targets that could help optimize flowering time and inflorescence development to generate higher yielding cultivars.

## STAR★METHODS

Detailed methods are provided in the online version of this paper and include the following:

- KEY RESOURCES TABLE
- RESOURCE AVAILABILITY
  - Lead contact
  - Materials availability
  - Data and code availability

- EXPERIMENTAL MODEL AND STUDY PARTICIPANT DETAILS
  - Plant materials
  - Growth conditions
- METHOD DETAILS
  - RNA extraction, sequencing, and expression analysis
  - Read alignment and expression analyses
  - Triad analysis
  - Clustering analysis
  - Co-expression gene network construction and visualization
  - Phylogenetic analysis
  - Wheat transformation, DNA extractions and sequencing
  - Phenotype analysis of inflorescence architecture, flowering, and grain morphology
  - *In situ* mRNA hybridization experiments
- QUANTIFICATION AND STATISTICAL ANALYSIS

## SUPPLEMENTAL INFORMATION

Supplemental information can be found online at <https://doi.org/10.1016/j.cub.2024.04.029>.

## ACKNOWLEDGMENTS

We acknowledge the BBSRC Norwich Research Park Doctoral Training Partnership for A.G. (BB/M011216/1), the BBSRC Designing Future Wheat programme (BB/P016855/1), the Royal Society (UF150081), and the Australian Research Council (FT210100810) for funding the research. We thank Guojing Jiang and Thorsten Schnurbusch (IPK Gatersleben, Germany) for sharing unpublished data, Chao Ma and Kara Schmidt (University of Adelaide) for assistance with the *in situ* hybridizations, Simon Griffiths and Richard Morris (JIC) for helpful comments during the project, and the horticultural and field services team at JIC for assistance with plant husbandry.

## AUTHOR CONTRIBUTIONS

A.G., A.K.A., and S.A.B. designed experiments; A.G., M.P., G.V.Y., A.K.A., S.H., M.A.S., and S.A.B. performed experiments; L.E.D. and S.A.B. supervised and supported the project; and A.G., L.E.D., and S.A.B. wrote and commented on the manuscript.

## DECLARATION OF INTERESTS

The authors declare no competing interests.

Received: November 15, 2023

Revised: March 8, 2024

Accepted: April 11, 2024

Published: May 22, 2024

## REFERENCES

1. Beales, J., Turner, A., Griffiths, S., Snape, J.W., and Laurie, D.A. (2007). A pseudo-response regulator is misexpressed in the photoperiod insensitive *Ppd-D1a* mutant of wheat (*Triticum aestivum* L.). *Theor. Appl. Genet.* **115**, 721–733.
2. Faure, S., Turner, A.S., Gruszka, D., Christodoulou, V., Davis, S.J., von Korff, M., and Laurie, D.A. (2012). Mutation at the circadian clock gene *EARLY MATURITY 8* adapts domesticated barley (*Hordeum vulgare*) to short growing seasons. *Proc. Natl. Acad. Sci. USA* **109**, 8328–8333.
3. Gao, H., Jin, M., Zheng, X.M., Chen, J., Yuan, D., Xin, Y., Wang, M., Huang, D., Zhang, Z., Zhou, K., et al. (2014). *Days to heading 7*, a major quantitative locus determining photoperiod sensitivity and regional adaptation in rice. *Proc. Natl. Acad. Sci. USA* **111**, 16337–16342.
4. Gonzalez, A.M., Vander Schoor, J.K., Fang, C., Kong, F., Wu, J., Weller, J.L., and Santalla, M. (2021). Ancient relaxation of an obligate short-day requirement in common bean through loss of *CONSTANS-like* gene function. *Curr. Biol.* **31**, 1643–1652.

5. Lu, S., Zhao, X., Hu, Y., Liu, S., Nan, H., Li, X., Fang, C., Cao, D., Shi, X., Kong, L., et al. (2017). Natural variation at the soybean J locus improves adaptation to the tropics and enhances yield. *Nat. Genet.* **49**, 773–779.
6. Murphy, R.L., Klein, R.R., Morishige, D.T., Brady, J.A., Rooney, W.L., Miller, F.R., Dugas, D.V., Klein, P.E., and Mullet, J.E. (2011). Coincident light and clock regulation of pseudoresponse regulator protein 37 (PRR37) controls photoperiodic flowering in sorghum. *Proc. Natl. Acad. Sci. USA* **108**, 16469–16474.
7. Perez-Gianmarco, T.J., Slafer, G.A., and Gonzalez, F.G. (2019). Photoperiod-sensitivity genes shape floret development in wheat. *J. Exp. Bot.* **70**, 1339–1348.
8. Prieto, P., Ochagavía, H., Savin, R., Griffiths, S., and Slafer, G.A. (2018). Dynamics of floret initiation/death determining spike fertility in wheat as affected by *Ppd* genes under field conditions. *J. Exp. Bot.* **69**, 2633–2645.
9. Turner, A., Beales, J., Faure, S., Dunford, R.P., and Laurie, D.A. (2005). The pseudo-response regulator *Ppd-H1* provides adaptation to photoperiod in barley. *Science* **310**, 1031–1034.
10. Gauley, A., and Boden, S.A. (2021). Stepwise increases in *FT1* expression regulate seasonal progression of flowering in wheat (*Triticum aestivum*). *New Phytol.* **229**, 1163–1176.
11. Bentley, A.R., Horsnell, R., Werner, C.P., Turner, A.S., Rose, G.A., Bedard, C., Howell, P., Wilhelm, E.P., Mackay, I.J., Howells, R.M., et al. (2013). Short, natural, and extended photoperiod response in BC<sub>2</sub>F<sub>4</sub> lines of bread wheat with different *Photoperiod-1* (*Ppd-1*) alleles. *J. Exp. Bot.* **64**, 1783–1793.
12. Cane, K., Eagles, H.A., Laurie, D.A., Trevaskis, B., Vallance, N., Eastwood, R.F., Gororo, N.N., Kuchel, H., and Martin, P.J. (2013). *Ppd-B1* and *Ppd-D1* and their effects in southern Australian wheat. *Crop Pasture Sci.* **64**, 100–114.
13. Fischer, R.A. (2011). Wheat physiology: a review of recent developments. *Crop Pasture Sci.* **62**, 95–114.
14. Worland, A., Börner, A., Korzun, V., Li, W., Petrović, S., and Sayers, E. (1998). The influence of photoperiod genes on the adaptability of European winter wheats. *Euphytica* **100**, 385–394.
15. Boden, S.A., Cavanagh, C., Cullis, B.R., Ramm, K., Greenwood, J., Jean Finnegan, E., Trevaskis, B., and Swain, S.M. (2015). *Ppd-1* is a key regulator of inflorescence architecture and paired spikelet development in wheat. *Nat. Plants* **1**, 14016.
16. Li, C., and Dubcovsky, J. (2008). Wheat FT protein regulates *VRN1* transcription through interactions with *FDL2*. *Plant J.* **55**, 543–554.
17. Shaw, L.M., Turner, A.S., Herry, L., Griffiths, S., and Laurie, D.A. (2013). Mutant alleles of *Photoperiod-1* in wheat (*Triticum aestivum* L.) that confer a late flowering phenotype in long days. *PLoS One* **8**, e79459.
18. Shaw, L.M., Turner, A.S., and Laurie, D.A. (2012). The impact of photoperiod insensitive *Ppd-1a* mutations on the photoperiod pathway across the three genomes of hexaploid wheat (*Triticum aestivum*). *Plant J.* **71**, 71–84.
19. Kirby, E., and Appleyard, M. (1987). *Cereal Development Guide*, 2nd Edition Edition (NAC Cereal Unit).
20. Ramirez-Gonzalez, R.H., Borrill, P., Lang, D., Harrington, S.A., Brinton, J., Venturini, L., Davey, M., Jacobs, J., van Ex, F., Pasha, A., et al. (2018). The transcriptional landscape of polyploid wheat. *Science* **361**, eaar6089.
21. Feng, N., Song, G., Guan, J., Chen, K., Jia, M., Huang, D., Wu, J., Zhang, L., Kong, X., Geng, S., et al. (2017). Transcriptome profiling of wheat inflorescence development from spikelet initiation to floral patterning identified stage-specific regulatory genes. *Plant Physiol.* **174**, 1779–1794.
22. Li, Y., Fu, X., Zhao, M., Zhang, W., Li, B., An, D., Li, J., Zhang, A., Liu, R., and Liu, X. (2018). A Genome-wide view of transcriptome dynamics during early spike development in bread wheat. *Sci. Rep.* **8**, 15338.
23. Egelund, J., Obel, N., Ulvskov, P., Geshi, N., Pauly, M., Bacic, A., and Petersen, B.L. (2007). Molecular characterization of two *Arabidopsis thaliana* glycosyltransferase mutants, *rra1* and *rra2*, which have a reduced residual arabinose content in a polymer tightly associated with the cellulosic wall residue. *Plant Mol. Biol.* **64**, 439–451.
24. Mortimer, J.C., Miles, G.P., Brown, D.M., Zhang, Z., Segura, M.P., Weimar, T., Yu, X., Seffen, K.A., Stephens, E., Turner, S.R., and Dupree, P. (2010). Absence of branches from xylan in *Arabidopsis gux* mutants reveals potential for simplification of lignocellulosic biomass. *Proc. Natl. Acad. Sci. USA* **107**, 17409–17414.
25. Galli, M., Liu, Q., Moss, B.L., Malcomber, S., Li, W., Gaines, C., Federici, S., Roshkovan, J., Meeley, R., Nemhauser, J.L., and Gallavotti, A. (2015). Auxin signaling modules regulate maize inflorescence architecture. *Proc. Natl. Acad. Sci. USA* **112**, 13372–13377.
26. Galweiler, L., Guan, C., Muller, A., Wisman, E., Mendgen, K., Yephremov, A., and Palme, K. (1998). Regulation of polar auxin transport by *AtPIN1* in *Arabidopsis* vascular tissue. *Science* **282**, 226–2230.
27. Park, J.E., Park, J.Y., Kim, Y.S., Staswick, P.E., Jeon, J., Yun, J., Kim, S.Y., Kim, J., Lee, Y.H., and Park, C.M. (2007). GH3-mediated auxin homeostasis links growth regulation with stress adaptation response in *Arabidopsis*. *J. Biol. Chem.* **282**, 10036–10046.
28. Simonini, S., Bencivenga, S., Trick, M., and Østergaard, L. (2017). Auxin-induced modulation of ETTIN activity orchestrates gene expression in *Arabidopsis*. *Plant Cell* **29**, 1864–1882.
29. Ulmasov, T., Hagen, G., and Guilfoyle, T.J. (1997). ARF1, a transcription factor that binds to auxin response elements. *Science* **276**, 1865–1868.
30. Sharman, B.C. (1983). Developmental anatomy of the inflorescence of bread wheat (*Triticum aestivum* L.) during normal initiation and when affected by 2,4-D. *Ann. Bot.* **52**, 621–639.
31. DeYoung, B.J., Bickle, K.L., Schrage, K.J., Muskett, P., Patel, K., and Clark, S.E. (2006). The CLAVATA1-related BAM1, BAM2 and BAM3 receptor kinase-like proteins are required for meristem function in *Arabidopsis*. *Plant J.* **45**, 1–16.
32. Heisler, M.G., Atkinson, A., Bylstra, Y.H., Walsh, R., and Smyth, D.R. (2001). *SPATULA*, a gene that controls development of carpel margin tissues in *Arabidopsis*, encodes a bHLH protein. *Development* **128**, 1089–1098.
33. Song, H.R., Song, J.D., Cho, J.N., Amasino, R.M., Noh, B., and Noh, Y.S. (2009). The RNA binding protein ELF9 directly reduces *SUPPRESSOR OF OVEREXPRESSION OF CO1* transcript levels in *Arabidopsis*, possibly via nonsense-mediated mRNA decay. *Plant Cell* **21**, 1195–1211.
34. Wei, N., Serino, G., and Deng, X.W. (2008). The COP9 signalosome: more than a protease. *Trends Biochem. Sci.* **33**, 592–600.
35. Honma, T., and Goto, K. (2000). The *Arabidopsis* floral homeotic gene *PISTILLATA* is regulated by discrete *cis*-elements responsive to induction and maintenance signals. *Development* **127**, 2021–2030.
36. Krogan, N.T., Hogan, K., and Long, J.A. (2012). *APETALA2* negatively regulates multiple floral organ identity genes in *Arabidopsis* by recruiting the co-repressor TOPLESS and the histone deacetylase HDA19. *Development* **139**, 4180–4190.
37. Ranocha, P., Dima, O., Nagy, R., Felten, J., Corratgé-Faillie, C., Novák, O., Morreel, K., Lacombe, B., Martinez, Y., Pfrunder, S., et al. (2013). *Arabidopsis* WAT1 is a vacuolar auxin transport facilitator required for auxin homeostasis. *Nat. Commun.* **4**, 2625.
38. Suzuki, T., Inagaki, S., Nakajima, S., Akashi, T., Ohto, M.A., Kobayashi, M., Seki, M., Shinozaki, K., Kato, T., Tabata, S., et al. (2004). A novel *Arabidopsis* gene *TONSOKU* is required for proper cell arrangement in root and shoot apical meristems. *Plant J.* **38**, 673–684.
39. Takeda, S., Tadele, Z., Hofmann, I., Probst, A.V., Angelis, K.J., Kaya, H., Araki, T., Mengiste, T., Mittelsten Scheid, O., Shibahara, K.I., et al. (2004). BRU1, a novel link between responses to DNA damage and epigenetic gene silencing in *Arabidopsis*. *Genes Dev.* **18**, 782–793.
40. Wang, W., Sijacic, P., Xu, P., Lian, H., and Liu, Z. (2018). *Arabidopsis* TSO1 and MYB3R1 form a regulatory module to coordinate cell proliferation with differentiation in shoot and root. *Proc. Natl. Acad. Sci. USA* **115**, E3045–E3054.
41. Adamski, N.M., Simmonds, J., Brinton, J.F., Backhaus, A.E., Chen, Y., Smedley, M., Hayta, S., Florio, T., Crane, P., Scott, P., et al. (2021). Ectopic expression of *Triticum polonicum* *VRT-A2* underlies elongated

- glumes and grains in hexaploid wheat in a dosage-dependent manner. *Plant Cell* **33**, 2296–2319.
42. Callens, C., Tucker, M.R., Zhang, D., and Wilson, Z.A. (2018). Dissecting the role of MADS-box genes in monocot floral development and diversity. *J. Exp. Bot.* **69**, 2435–2459.
  43. Chen, Y., Liu, Y., Zhang, J., Torrance, A., Watanabe, N., Adamski, N.M., and Uauy, C. (2022). The *Triticum ispahanicum* elongated glume locus P2 maps to chromosome 6A and is associated with the ectopic expression of *SVP-A1*. *Theor. Appl. Genet.* **135**, 2313–2331.
  44. Li, C., Lin, H., Chen, A., Lau, M., Jernstedt, J., and Dubcovsky, J. (2019). Wheat *VRN1*, *FUL2* and *FUL3* play critical and redundant roles in spikelet development and spike determinacy. *Development* **146**, dev175398.
  45. Li, K., Debernardi, J.M., Li, C., Lin, H., Zhang, C., Jernstedt, J., Korff, M.V., Zhong, J., and Dubcovsky, J. (2021). Interactions between *SQUAMOSA* and *SHORT VEGETATIVE PHASE* MADS-box proteins regulate meristem transitions during wheat spike development. *Plant Cell* **33**, 3621–3644.
  46. Liu, J., Chen, Z., Wang, Z., Zhang, Z., Xie, X., Wang, Z., Chai, L., Song, L., Cheng, X., Feng, M., et al. (2021). Ectopic expression of *VRT-A2* underlies the origin of *Triticum polonicum* and *Triticum petropavlovskiyi* with long outer glumes and grains. *Mol. Plant* **14**, 1472–1488.
  47. Schilling, S., Kennedy, A., Pan, S., Jermini, L.S., and Melzer, R. (2020). Genome-wide analysis of MIKC-type MADS-box genes in wheat: pervasive duplications, functional conservation and putative neofunctionalization. *New Phytol.* **225**, 511–529.
  48. Backhaus, A.E., Lister, A., Tomkins, M., Adamski, N.M., Simmonds, J., Macaulay, I., Morris, R.J., Haerty, W., and Uauy, C. (2022). High expression of the MADS-box gene *VRT2* increases the number of rudimentary basal spikelets in wheat. *Plant Physiol.* **189**, 1536–1552.
  49. Dixon, L.E., Greenwood, J.R., Bencivenga, S., Zhang, P., Cockram, J., Mellers, G., Ramm, K., Cavanagh, C., Swain, S.M., and Boden, S.A. (2018). *TEOSINTE BRANCHED1* regulates inflorescence architecture and development in bread wheat (*Triticum aestivum*). *Plant Cell* **30**, 563–581.
  50. Dixon, L.E., Pasquariello, M., Badgami, R., Levin, K.A., Poschet, G., Ng, P.Q., Orford, S., Chayut, N., Adamski, N.M., Brinton, J., et al. (2022). MicroRNA-resistant alleles of *HOMEODOMAIN-2* modify inflorescence branching and increase grain protein content of wheat. *Sci. Adv.* **8**, eabn5907.
  51. Dobrovolskaya, O., Pont, C., Sibout, R., Martinek, P., Badaeva, E., Murat, F., Chosson, A., Watanabe, N., Prat, E., Gautier, N., et al. (2015). *FRIZZY PANICLE* drives supernumerary spikelets in bread wheat. *Plant Physiol.* **167**, 189–199.
  52. Poursarebani, N., Seidensticker, T., Koppolu, R., Trautewig, C., Gawroński, P., Bini, F., Govind, G., Rutten, T., Sakuma, S., Tagiri, A., et al. (2015). The genetic basis of composite spike form in barley and 'Miracle-Wheat'. *Genetics* **201**, 155–165.
  53. Wang, Y., Du, F., Wang, J., Wang, K., Tian, C., Qi, X., Lu, F., Liu, X., Ye, X., and Jiao, Y. (2022). Improving bread wheat yield through modulating an unselected *AP2/ERF* gene. *Nat. Plants* **8**, 930–939.
  54. Kuzay, S., Lin, H., Li, C., Chen, S., Woods, D.P., Zhang, J., Lan, T., von Korff, M., and Dubcovsky, J. (2022). *WAPO-A1* is the causal gene of the 7AL QTL for spikelet number per spike in wheat. *PLoS Genet.* **18**, e1009747.
  55. Shaw, L.M., Lyu, B., Turner, R., Li, C., Chen, F., Han, X., Fu, D., and Dubcovsky, J. (2019). *FLOWERING LOCUS T2* regulates spike development and fertility in temperate cereals. *J. Exp. Bot.* **70**, 193–204.
  56. Zhang, X., Jia, H., Li, T., Wu, J., Nagarajan, R., Lei, L., Powers, C., Kan, C.-C., Hua, W., Liu, Z., et al. (2022). *TaCol-B5* modifies spike architecture and enhances grain yield in wheat. *Science* **376**, 180–183.
  57. Beretta, V.M., Franchini, E., Ud Din, I., Lacchini, E., Van den Broeck, L., Sozzani, R., Orozco-Arroyo, G., Caporali, E., Adam, H., Jouannic, S., et al. (2023). The *ALOG* family members *OsG1L1* and *OsG1L2* regulate inflorescence branching in rice. *Plant J.* **115**, 351–368.
  58. Takeda, S., Hanano, K., Kariya, A., Shimizu, S., Zhao, L., Matsui, M., Tasaka, M., and Aida, M. (2011). CUP-SHAPED COTYLEDON1 transcription factor activates the expression of *LSH4* and *LSH3*, two members of the *ALOG* gene family, in shoot organ boundary cells. *Plant J.* **66**, 1066–1077.
  59. Yoshida, A., Sasao, M., Yasuno, N., Takagi, K., Daimon, Y., Chen, R., Yamazaki, R., Tokunaga, H., Kitaguchi, Y., Sato, Y., et al. (2013). *TAWAWA1*, a regulator of rice inflorescence architecture, functions through the suppression of meristem phase transition. *Proc. Natl. Acad. Sci. USA* **110**, 767–772.
  60. Boden, S.A., McIntosh, R.A., Uauy, C., Krattinger, S.G., Dubcovsky, J., Rogers, W.J., Xia, X.C., Badaeva, E.D., Bentley, A.R., Brown-Guedira, G., et al. (2023). Updated guidelines for gene nomenclature in wheat. *Theor. Appl. Genet.* **136**, 72.
  61. Borrill, P., Ramirez-Gonzalez, R., and Uauy, C. (2016). expVIP: a customizable RNA-seq data analysis and visualization platform. *Plant Physiol.* **170**, 2172–2186.
  62. Wu, J., Lawit, S.J., Weers, B., Sun, J., Mongar, N., Van Hemert, J., Melo, R., Meng, X., Rupe, M., Clapp, J., et al. (2019). Overexpression of *zmm28* increases maize grain yield in the field. *Proc. Natl. Acad. Sci. USA* **116**, 23850–23858.
  63. Love, M.I., Huber, W., and Anders, S. (2014). Moderated estimation of fold change and dispersion for RNA-seq data with DESeq2. *Genome Biol.* **15**, 550.
  64. Wang, Y., Yu, H., Tian, C., Sajjad, M., Gao, C., Tong, Y., Wang, X., and Jiao, Y. (2017). Transcriptome association identifies regulators of wheat spike architecture. *Plant Physiol.* **175**, 746–757.
  65. Glenn, P., Woods, D.P., Zhang, J., Gabay, G., Odle, N., and Dubcovsky, J. (2023). Wheat *bZIP1* interacts with *FT2* and contributes to the regulation of spikelet number per spike. *Theor. Appl. Genet.* **136**, 237.
  66. Waha, K., Dietrich, J.P., Portmann, F.T., Siebert, S., Thornton, P.K., Bondeau, A., and Herrero, M. (2020). Multiple cropping systems of the world and the potential for increasing cropping intensity. *Glob. Environ. Change.* **64**, 102131.
  67. Jiang, G., Koppolu, R., Rutten, T., Hensel, G., Lundqvist, U., Tandron Moya, Y.A., Huang, Y., Rajaraman, J., Poursarebani, N., von Wirén, N., et al. (2024). Non-cell-autonomous signaling associated with barley *ALOG1* specifies spikelet meristem determinacy. *Curr. Biol.* <https://doi.org/10.1016/j.cub.2024.04.083>.
  68. Bray, N.L., Pimentel, H., Melsted, P., and Pachter, L. (2016). Near-optimal probabilistic RNA-seq quantification. *Nat. Biotechnol.* **34**, 525–527.
  69. Pimentel, H., Bray, N.L., Puente, S., Melsted, P., and Pachter, L. (2017). Differential analysis of RNA-seq incorporating quantification uncertainty. *Nat. Methods* **14**, 687–690.
  70. Young, M.D., Wakefield, M.J., Smyth, G.K., and Oshlack, A. (2010). Gene ontology analysis for RNA-seq: accounting for selection bias. *Genome Biol.* **11**, R14.
  71. Hamilton, N.E., and Ferry, M. (2018). Ggtern: Ternary diagrams using ggplot2. *J. Stat. Softw.* **87**, 1–17.
  72. Abu-Jamous, B., and Kelly, S. (2018). Clust: automatic extraction of optimal co-expressed gene clusters from gene expression data. *Genome Biol.* **19**, 172.
  73. Langfelder, P., and Horvath, S. (2008). WGCNA: an R package for weighted correlation network analysis. *BMC Bioinform.* **9**, 559.
  74. Shannon, P., Markiel, A., Ozier, O., Baliga, N.S., Wang, J.T., Ramage, D., Amin, N., Schwikowski, B., and Ideker, T. (2003). Cytoscape: a software environment for integrated models of biomolecular interaction networks. *Genome Res.* **13**, 2498–2504.
  75. International Wheat Genome Sequencing Consortium (IWGSC) (2018). Shifting the limits in wheat research and breeding using a fully annotated reference genome. *Science* **361**, eaar7191.
  76. Brinton, J., Simmonds, J., and Uauy, C. (2018). Ubiquitin-related genes are differentially expressed in isogenic lines contrasting for pericarp cell size and grain weight in hexaploid wheat. *BMC Plant Biol.* **18**, 22.

77. Mauri, M., Elli, T., Caviglia, G., Uboldi, G., and Azzi, M. (2017). RAWGraphs: A Visualisation Platform to Create Open Outputs. In Proceedings of the 12th Biannual Conference on Italian SIGCHI Chapter (Association for Computing Machinery).
78. Edgar, R.C. (2004). MUSCLE: multiple sequence alignment with high accuracy and high throughput. *Nucleic Acids Res.* *32*, 1792–1797.
79. Kumar, S., Stecher, G., Li, M., Knyaz, C., and Tamura, K. (2018). MEGA X: molecular evolutionary genetics analysis across computing platforms. *Mol. Biol. Evol.* *35*, 1547–1549.
80. Hayta, S., Smedley, M.A., Clarke, M., Forner, M., and Harwood, W.A. (2021). An efficient *Agrobacterium*-mediated transformation protocol for hexaploid and tetraploid wheat. *Curr. Protoc.* *1*, e58.
81. Smedley, M.A., Hayta, S., Clarke, M., and Harwood, W.A. (2021). CRISPR-Cas9 based genome editing in wheat. *Curr. Protoc.* *1*, e65.
82. Li, G., Kuijter, H.N.J., Yang, X., Liu, H., Shen, C., Shi, J., Betts, N., Tucker, M.R., Liang, W., Waugh, R., et al. (2021). MADS1 maintains barley spike morphology at high ambient temperatures. *Nat. Plants* *7*, 1093–1107.

STAR★METHODS

KEY RESOURCES TABLE

| REAGENT or RESOURCE                                                                                                                                                                                                                                                                                                                                                                                                                                                                                | SOURCE                                                   | IDENTIFIER        |
|----------------------------------------------------------------------------------------------------------------------------------------------------------------------------------------------------------------------------------------------------------------------------------------------------------------------------------------------------------------------------------------------------------------------------------------------------------------------------------------------------|----------------------------------------------------------|-------------------|
| <b>Critical commercial assays</b>                                                                                                                                                                                                                                                                                                                                                                                                                                                                  |                                                          |                   |
| RNeasy Plant Mini Kit                                                                                                                                                                                                                                                                                                                                                                                                                                                                              | Qiagen                                                   | 74904             |
| TURBO DNA-free Kit                                                                                                                                                                                                                                                                                                                                                                                                                                                                                 | ThermoFisher Scientific                                  | AM1907            |
| NEBNext Ultra RNA Library Prep Kit for Illumina                                                                                                                                                                                                                                                                                                                                                                                                                                                    | New England Biolabs                                      | E7770             |
| <b>Deposited data</b>                                                                                                                                                                                                                                                                                                                                                                                                                                                                              |                                                          |                   |
| Raw data from RNA-seq analysis                                                                                                                                                                                                                                                                                                                                                                                                                                                                     | This paper                                               | SRA: PRJNA1081669 |
| <b>Experimental models: Organisms/strains</b>                                                                                                                                                                                                                                                                                                                                                                                                                                                      |                                                          |                   |
| Hexaploid wheat ( <i>Triticum aestivum</i> ), cv. Paragon                                                                                                                                                                                                                                                                                                                                                                                                                                          | Bentley et al. <sup>11</sup> ; Shaw et al. <sup>17</sup> | N/A               |
| Hexaploid wheat, near-iosgenic lines:<br><i>Ppd-D1a</i> and <i>ppd-1</i> null                                                                                                                                                                                                                                                                                                                                                                                                                      | Bentley et al. <sup>11</sup> ; Shaw et al. <sup>17</sup> | 3A-7 and 3C-17    |
| <i>ALOG1</i> CRISPR lines: <i>alog1_m1</i> and <i>alog1_m2</i>                                                                                                                                                                                                                                                                                                                                                                                                                                     | This paper                                               | N/A               |
| <i>PDB1</i> CRISPR lines: <i>pdb1_m1</i> and <i>pdb1_m2</i>                                                                                                                                                                                                                                                                                                                                                                                                                                        | This paper                                               | N/A               |
| <b>Oligonucleotides</b>                                                                                                                                                                                                                                                                                                                                                                                                                                                                            |                                                          |                   |
| sgRNAs used to generate <i>ALOG1</i> CRISPR lines:<br>AGCGCGGTGGACAGCCCTGG (sgRNA_1),<br>GCAGGTACGAGTCGAGAAAGCGG (sgRNA_2),<br>GCACCGCGCCAGCTCCAGCGGG (sgRNA_3),<br>GCCCCCGCTGGAGCTGGCGCGG (sgRNA_4)                                                                                                                                                                                                                                                                                               | This paper                                               | N/A               |
| sgRNAs used to generate <i>PDB1</i> CRISPR lines:<br>ATGGCGTCCTCCAGCGGGAGCGG (sgRNA_1),<br>CACGGGCTCGCTGTCGACGGCGG (sgRNA_2),<br>TGGAGCAGCGCCGGCCAAGCGG (sgRNA_3),<br>GCGCGGCGAGGTCGTGAGGTGG (sgRNA_4)                                                                                                                                                                                                                                                                                             | This paper                                               | N/A               |
| Oligonucleotides to amplify across gene-edited sites:<br>CTTGATCTGCCATAGCTAGAATC and<br>TGGTCTTGCCGAAGTGGTC ( <i>ALOG-A1</i> ),<br>GCTGAATCCTGATATGCCATG and<br>TGGTCTTGCCGAAGTGGTC ( <i>ALOG-B1</i> ),<br>CTGAATCCTCATCTGCCGTAG and<br>TGGTCTTGCCGAAGTGGTC ( <i>ALOG-D1</i> ),<br>AAGGAAAGCAGGGAGTGCC and<br>GCTGGGAACATGAACATCTC ( <i>PDB-A1</i> ),<br>CTCGTTACTCTCTCTCTCTCGTC and<br>GCTGGGAACATGAACATCTC ( <i>PDB-B1</i> ),<br>TGCCTGCTCGCTTGGTG and<br>GCTGGGAACATGAACATCTC ( <i>PDB-D1</i> ) | This paper                                               | N/A               |
| Oligonucleotides used to generate probes for <i>in situ</i><br>hybridisation: CGCACTACCTGTTCCCAT and<br>TAATACGACTCACTATAGGGCTAGGGGTGTTCC<br>AAAT-GGCG ( <i>ALOG1</i> , AS), CTAGGGGTGTTCAA<br>ATGGCG and TAATACGACTCACTATAGGGCGC<br>ACTACCTGTTCCC-CAT ( <i>ALOG1</i> , S); GGCACGGA<br>GGAGGAGATG and TAATACGACTCACTATAGGGC<br>TCATGCAGGCGATGA-TGTC ( <i>PDB1</i> , AS);<br>CTCATGCAGGCGATGATGTC and<br>TAATACGACTCACTATAGGGGCACGG<br>AGGAGGAG-ATG ( <i>PDB1</i> , S).                            | This paper                                               | N/A               |
| Oligonucleotides used for qRT-PCR:<br>AGCTCGACGCTGAGAATTAAG and<br>GCGAGATGACCAAGCCAAG ( <i>ALOG1</i> ),<br>GACTTCCTTTCAGATCCTCC and<br>TGAACACCGAAGCATCAG ( <i>PDB1</i> )                                                                                                                                                                                                                                                                                                                         | This paper                                               | N/A               |

(Continued on next page)



**Continued**

| REAGENT or RESOURCE     | SOURCE                                                        | IDENTIFIER                          |
|-------------------------|---------------------------------------------------------------|-------------------------------------|
| Software and algorithms |                                                               |                                     |
| Kallisto                | Bray et al. <sup>68</sup>                                     | v0.42.3                             |
| Sleuth                  | Pimentel et al. <sup>69</sup>                                 | 0.28.0                              |
| GOseq                   | Young et al. <sup>70</sup>                                    | v.3.0.4                             |
| ggplot2 R package       | Hamilton et al. <sup>71</sup>                                 | N/A                                 |
| Clust                   | Abu-Jamous and Kelly <sup>72</sup>                            | N/A                                 |
| WGCNA R package         | Langfelder et al. <sup>73</sup>                               | N/A                                 |
| DESeq2                  | Love et al. <sup>63</sup>                                     | N/A                                 |
| Cytoscape               | Shannon et al. <sup>74</sup>                                  | 3.10.1                              |
| Other                   |                                                               |                                     |
| IWGSC Reference genome  | IWGSC <sup>75</sup> and Ramirez-Gonzalez et al. <sup>20</sup> | IWGSC_v1.1_ALL_20170706_transcripts |

**RESOURCE AVAILABILITY**

**Lead contact**

Further information and requests for resources and reagents should be directed to the lead contact, Scott Boden ([scott.boden@adelaide.edu.au](mailto:scott.boden@adelaide.edu.au)).

**Materials availability**

The genetic resources generated in this study are available from the corresponding author or the Germplasm Resource Unit (John Innes Centre, Norwich, UK) upon request.

**Data and code availability**

- The RNA-seq sequencing data used for the transcriptome analyses performed here have been deposited at NCBI Sequence Read Archive (SRA) and are publicly available. The project number is listed in the [key resources table](#).
- The paper does not report original code.
- Any additional information required to reanalyze the data reported here is available from the lead author upon request.

**EXPERIMENTAL MODEL AND STUDY PARTICIPANT DETAILS**

**Plant materials**

Hexaploid wheat genotypes (*Triticum aestivum*) used here included: wild-type photoperiod-sensitive *cv.* Paragon; Paragon near-isogenic lines (NILs) containing the *Ppd-D1a* photoperiod-insensitive allele or null *ppd-1* alleles on the A, B and D genomes<sup>11,17,18</sup>; and transgenic lines containing edits in all three homeologs of *PDB1* and *ALOG1* generated in *cv.* Fielder (see details below).

**Growth conditions**

The three *Ppd-1* NILs were grown at field sites based at Church Farm, John Innes Centre, Bawburgh, Norfolk, UK (52°62'25.7"N, 1°21'83.2"E) in 1 m<sup>2</sup> plots. Seeds were sown in week 2 of October 2017. Wild-type Fielder and the *pdb1\_m1*, *pdb1\_m2*, *alog1\_m1*, *alog1\_m2* lines used for phenotype analysis were grown in controlled growth cabinets under short-day (8 h/16 h light/dark) or long-day (16 h / 8 h light/dark) photoperiods at 300 μmol/m<sup>2</sup>/s (using Plantastar 400-W HQI bulbs [Osram] and Maxim 60-W tungsten bulbs) and 20°C/15°C (day/night) temperatures. The gene edited lines used for phenotype analysis were from the T<sub>3</sub> generation and traits were verified using T<sub>4</sub> generation plants.

**METHOD DETAILS**

**RNA extraction, sequencing, and expression analysis**

For RNA-seq transcriptome analysis, inflorescences were collected from wild-type, *Ppd-D1a* and *ppd-1* NILs (*cv.* Paragon) at the vegetative (VG), double ridge (DR), lemma primordium (LP) and terminal spikelet (TS) stages. Three biological replicates were collected per stage, with each replicate being a pool of 5 – 15 inflorescences. RNA was extracted using the RNeasy Plant Mini Kit (Qiagen, The Netherlands) and treated with TURBO DNA-free Kit (Thermo Fischer Scientific, USA). RNA was examined by gel electrophoresis; RNA purity was checked using the NanoPhotometer spectrophotometer (IMPLEN, USA), and RNA integrity examined

using the RNA Nano 6000 Assay Kit and Bioanalyzer 2100 system (Agilent Technologies, USA). Library construction and RNA-seq were performed by Novogene (Novogene HK Company Ltd., Hong Kong). Sequencing libraries were generated using the NEBNext Ultra RNA Library Prep Kit for Illumina (NEB), and index codes were added to attribute sequences to each sample. For sequencing, clustering of the index-coded samples was performed on the cBot Cluster Generation System using the TruSeq PE Cluster Kit v3-cBot-HS (Illumina, USA). After cluster generation, the libraries were sequenced on an Illumina NovaSeq platform to generate 150-bp paired-end reads.

For the quantitative real-time PCR analysis (qRT-PCR), RNA was extracted from the following tissues of wild-type cv. Paragon: young emerging leaves (lamina; harvested at LP stage); flag leaf (lamina; harvested after ear emergence); inflorescences at LP (pool of 10 inflorescences), and root tips (pool of 10 root tips per replicate) from wheat seedlings. RNA was extracted using the RNeasy Plant Mini Kit and treated with TURBO DNA-free Kit before cDNA synthesis. Synthesis of cDNA and qRT-PCR were performed as described previously.<sup>49</sup> Oligonucleotides for qRT-PCR analysis are provided in the [key resources table](#). Expression of candidate genes was normalized using *TraesCS6D02G145100* and *TraesCS5A02G015600*,<sup>60</sup> and data are average of four biological replicates and two technical replicates.

### Read alignment and expression analyses

Read alignment and differential expression analysis was carried out as described previously.<sup>76</sup> Reads were aligned to the IWGSC Chinese Spring reference genome model index v1.1.<sup>75</sup> Read alignment and expression quantification of transcripts were completed using kallisto-0.42.3 with default parameters,<sup>68</sup> 30 bootstraps (-b 30) and the -pseudobam option as used previously.<sup>20,50</sup> Differential expression analysis was performed for the stage specific samples of wild-type and between samples of each genotype using sleuth-0.28.0,<sup>69</sup> with default parameters, and transcripts with a mean abundance of < 0.5 TPM in all three genotypes in all stages were excluded from further analysis. Transcripts that had a false-discovery rate adjusted *p*-value (*q* value) < 0.05 and a difference of > 0.5 TPM were considered to be differentially expressed.<sup>76</sup> For each condition, the mean TPM of all three biological replicates was calculated ± standard error of the mean (s.e.m.).

Predicted functional annotation of transcripts was performed using Ensembl Plants Biomarts, with transcripts selected based on 2 or 3 homeologs displaying similar profiles and being homologs of genes with known functions in *Arabidopsis thaliana*, maize (*Zea mays*) and rice (*Oryza sativa*). Gene ontology (GO) term enrichment analysis was performed using the R package Goseq v.1.40.0.<sup>70</sup> Significantly enriched GO terms were those that had adjusted *p* values of <0.05.

For data visualization, normalized mean TPM of each transcript is shown as log<sub>2</sub> fold-changes, relative to wild-type (Figure 4) or vegetative and terminal spikelet stages (Figures 1 and 5), were visualized as a heatmap using the heatmap.2 function in the R package gplots v.3.0.4, as described previously.<sup>50</sup> For the MADS-box genes, TPM data for each transcript was normalized using a combination of quantile normalization, log<sub>2</sub> and Z score normalization, so transcripts with different abundances could be plotted on the same graph. Ribbon plots of transcript expressions were plotted using the R package ggplot2 as described previously,<sup>10</sup> showing average TPM (solid line) and s.e.m. (shaded region) of three biological replicates.

### Triad analysis

Triad analysis was performed as described previously.<sup>20</sup> Triad analysis was performed exclusively on gene triads that had a 1:1:1 correspondence across the three homoeologous subgenomes, and a gene triad was deemed to be expressed when total expression was >0.5 TPM. (21,627 gene triads were detected). To standardize expression of all genes, the TPM for each gene was represented as a percentage of total triad expression. The relative triad expressions were then plotted into ternary diagrams using the R package ggttern.<sup>71</sup>

### Clustering analysis

Clustering analysis was performed using the python package *clust*<sup>72</sup> on the 30,000 most abundant transcripts across the four developmental stages. TPM data for each transcript was normalized to the input data using a combination of quantile normalization, log<sub>2</sub> and Z score. The package was run using default parameters. To confirm clusters generated using the 30,000 most abundant transcripts (including 19,804 HC genes, with 2,674 represented by more than one splice variant) provided a reliable assessment, we performed *clust* analysis using: 1) TPM of genes where values for multiple transcript variants of a given gene within the 30,000 transcripts were collapsed to a single value, and 2) all transcripts with a TPM value > 0.5. These analyses identified similar clusters, validating the cluster analysis presented in Figures 1 and S1. Following generation of transcript clusters for all three genotypes, transcript profiles were compared between genotypes and presented using alluvial plot visuals, created using RAWGraphs.<sup>77</sup>

### Co-expression gene network construction and visualization

TPM and count values of the differentially expressed transcripts were summarized at the gene level and used for the construction of co-expression gene networks. Only genes with TPM ≥ 0.5 in at least one sample were included in this analysis. A scale-free co-expression network was constructed using the WGCNA package in R for each genotype.<sup>73</sup> The count values of the selected genes were normalized using the varianceStabilizingTransformation function from DESeq2.<sup>63</sup> The scale-free topology criterion was used to select the soft power threshold for adjacency calculation. The adjacency matrices were transformed into a topological overlap matrix (TOM), measuring the network connectivity of a gene defined as the sum of its adjacency with all other genes for network generation. The blockwiseModules() function was used to calculate matrices and construct blockwise networks using the following parameters:

NetworkType = “signed hybrid”; maxBlockSize = 25,000 genes; power = 15, 11, and 20 for WT, *Ppd-D1a*, and *ppd-1*, respectively; corType = “bicolor”; maxPOutliers = 0.05; TOMType = “unsigned”; mergeCutHeight = 0.15; and minModuleSize = 30. Average linkage hierarchical clustering was used to classify genes with similar expression profiles into gene modules. Hub genes within each module were identified using the function signedKME. Modules that contain *Ppd-1* homeologs were identified and used to assess and visualize the connection to other genes, including those are known to be related to spike development in wheat. The “exportNetwork-ToCytoscape” function was used to create edge and node files to be used to visualize the network using Cytoscape software (version 3.10.1).<sup>74</sup> To reduce the complexity of the visualized networks, a weight (connection strength between two genes) threshold >1 was used to filter visualized genes.

### Phylogenetic analysis

Sequences for homologs of ALOG1 and PDB1 were obtained by BLAST (Basic Local Alignment Search Tool) analysis using Ensembl Plants website (<https://plants.ensembl.org/index.html>). Amino acid sequence alignments were performed using MUSCLE v3.8.425 with default parameters and were checked manually.<sup>78</sup> Unrooted trees were generated using MEGAX,<sup>79</sup> with the maximum likelihood method, 100 bootstrap replicates. The Jones-Taylor-Thornton (JTT) matrix-based model was used for both trees, using partial deletions and gamma distributed rates. For all, positions with less than 95% site coverage were eliminated, i.e., fewer than 5% alignment gaps, missing data, and ambiguous bases were allowed at any position.

### Wheat transformation, DNA extractions and sequencing

Gene sequences for *PDB-A1*, *-B1*, *-D1* and *ALOG-A1*, *-B1* and *-D1* were obtained from the Ensembl Plants website (<https://plants.ensembl.org/index.html>). Four single guide RNA (sgRNA) sequences were designed to target all three homeologs of *PDB1* and *ALOG1* in the respective experiments (sequences are provided in KRT). The *pdb1* and *alog1* gene edited lines were generated using Clustered regularly interspaced short palindromic repeats (CRISPR)/Cas9 and *Agrobacterium*-mediated transformation of immature embryos isolated from cv. Fielder, as described previously.<sup>80,81</sup> Leaf tissue from seedlings of gene-edited plants (T<sub>1</sub>, T<sub>2</sub>, T<sub>3</sub> and T<sub>4</sub> generations) were sampled and genomic DNA was extracted.<sup>60</sup> Clones of *PDB1* and *ALOG1* homeologs were amplified to detect gene edits using PrimeSTAR GXL DNA polymerase (Takara Bio) and oligonucleotides provided in KRT. DNA fragments were sequenced using the Big-Dye Terminator Sequencing v3.1 Ready Reaction Kit (PerkinElmer, Applied BioSystems, Thermo Fischer Scientific) or with Mix2Seq Kit (Eurofins), and aligned to the reference sequences using SnapGene software ([www.snapgene.com](http://www.snapgene.com)). Corresponding DNA regions from other members of the group S bZIP and ALOG transcription factor families were amplified and sequenced to confirm edits only occurred in the target sequences.

### Phenotype analysis of inflorescence architecture, flowering, and grain morphology

All primary and secondary spikelets (fertile and rudimentary) were counted using the inflorescence of the main shoot. Images of inflorescences from *alog1* gene-edited lines highlight secondary spikelets in pink, performed using Adobe Photoshop (Adobe). Flowering-time measurements and secondary spikelet distribution were determined as described previously,<sup>15,50</sup> with values being the average ± s.e.m. for 4-5 biological replicates. Grain morphology measurements (grain area and thousand grain weight) were recorded using the MARVIN grain analyzer (GTA Sensorik GmbH, Germany). Measurements for each genotype include 4-5 biological replicates. The grain of *alog1\_m1* mutants separated into those derived from either the primary or secondary spikelets.

### In situ mRNA hybridization experiments

*In situ* hybridization was performed as described previously,<sup>82</sup> using inflorescence samples collected at the double ridge and glume primordium stages from cv. Paragon. Probe templates for *PDB1* and *ALOG1* were amplified by PCR using gene-specific oligonucleotides, which were fused with the T7 promoter (KRT). Images were obtained using an optical microscope (Ni-E, Nikon).

### QUANTIFICATION AND STATISTICAL ANALYSIS

All statistical analyses were performed using R version 4.2.0 (<http://www.r-project.org/>). Principal component analysis of transcript libraries from each of the three genotypes was performed using the R package DESeq2.<sup>63</sup> For analysis of the phenotypes of the gene-edited lines, the normality of the data was confirmed using the Shapiro–Wilk test, and means were compared statistically using a one-way ANOVA with Tukey post hoc test. Data comparing the grain of primary and secondary spikelets from *alog1\_m1* were analyzed using a Student’s two-tailed *t*-test. In all boxplots, each box is bound by the upper and lower quartiles, and the center line represents the median. Whiskers show the maximum and minimum values, and filled circles or dots represent individual data points.

Current Biology, Volume 34

## Supplemental Information

***Photoperiod-1* regulates the wheat inflorescence  
transcriptome to influence spikelet  
architecture and flowering time**

**Adam Gauley, Marianna Pasquariello, Guilherme V. Yoshikawa, Abdul Kader Alabdullah, Sadiye Hayta, Mark A. Smedley, Laura E. Dixon, and Scott A. Boden**

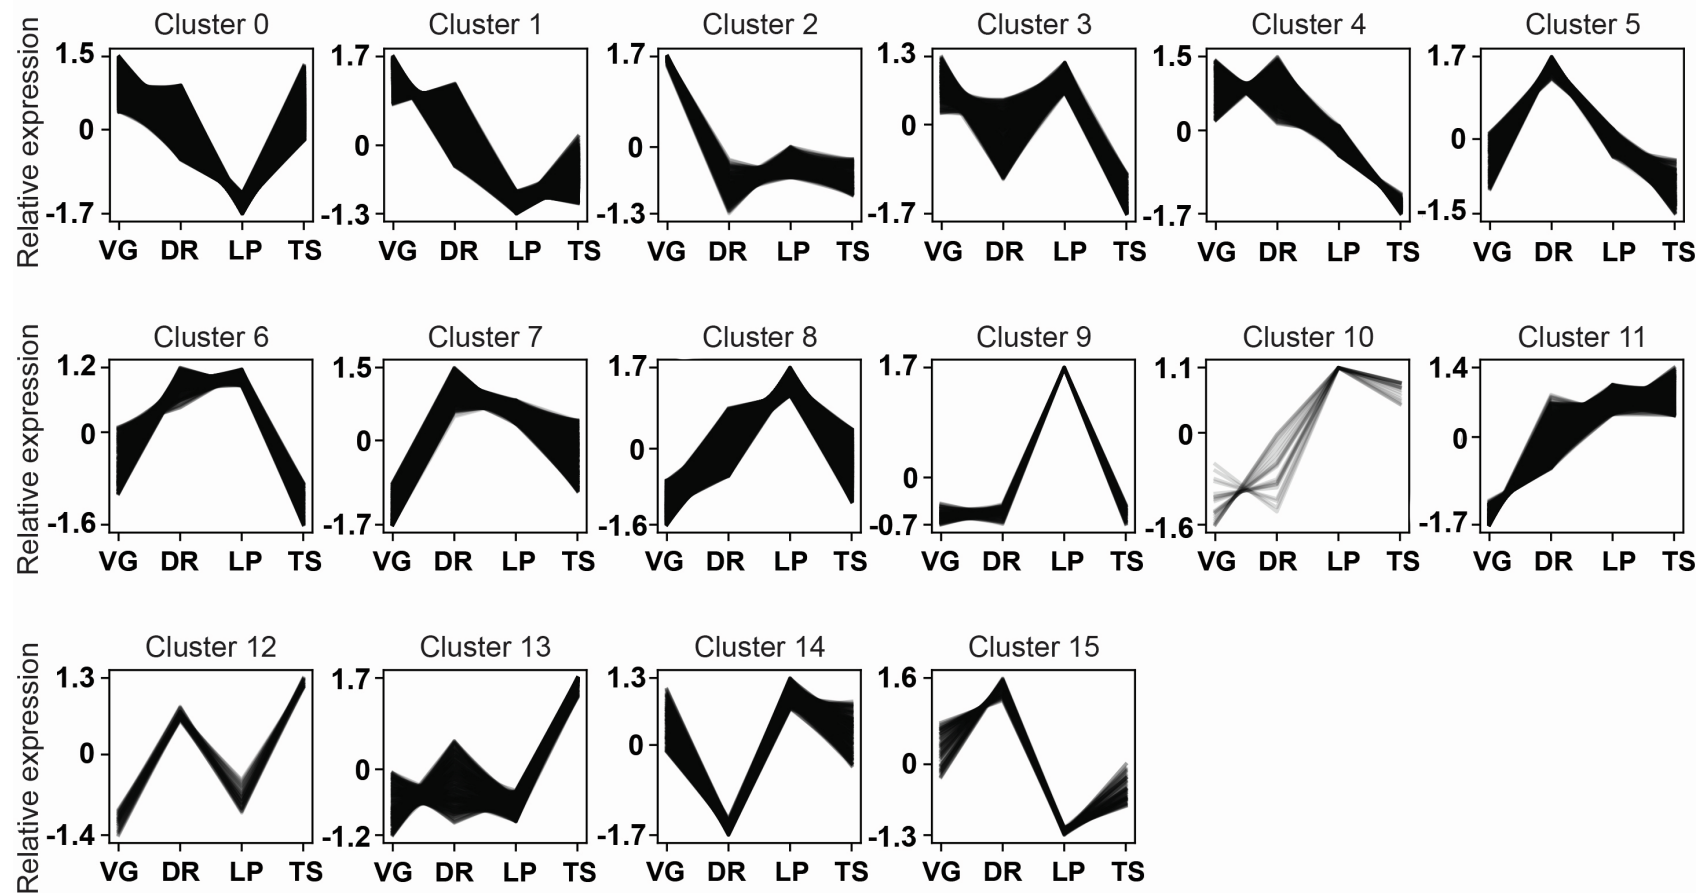

**Figure S1: Cluster analysis of transcripts expressed during early wheat inflorescence development, related to Figure 1.** Analysis of the 30,000 most abundant transcripts during early inflorescence development of wild-type plants identified 15 clusters that show unique stage-specific profiles between the vegetative (VG), double ridge (DR), lemma primordium (LP) and terminal spikelet (TS) stages.

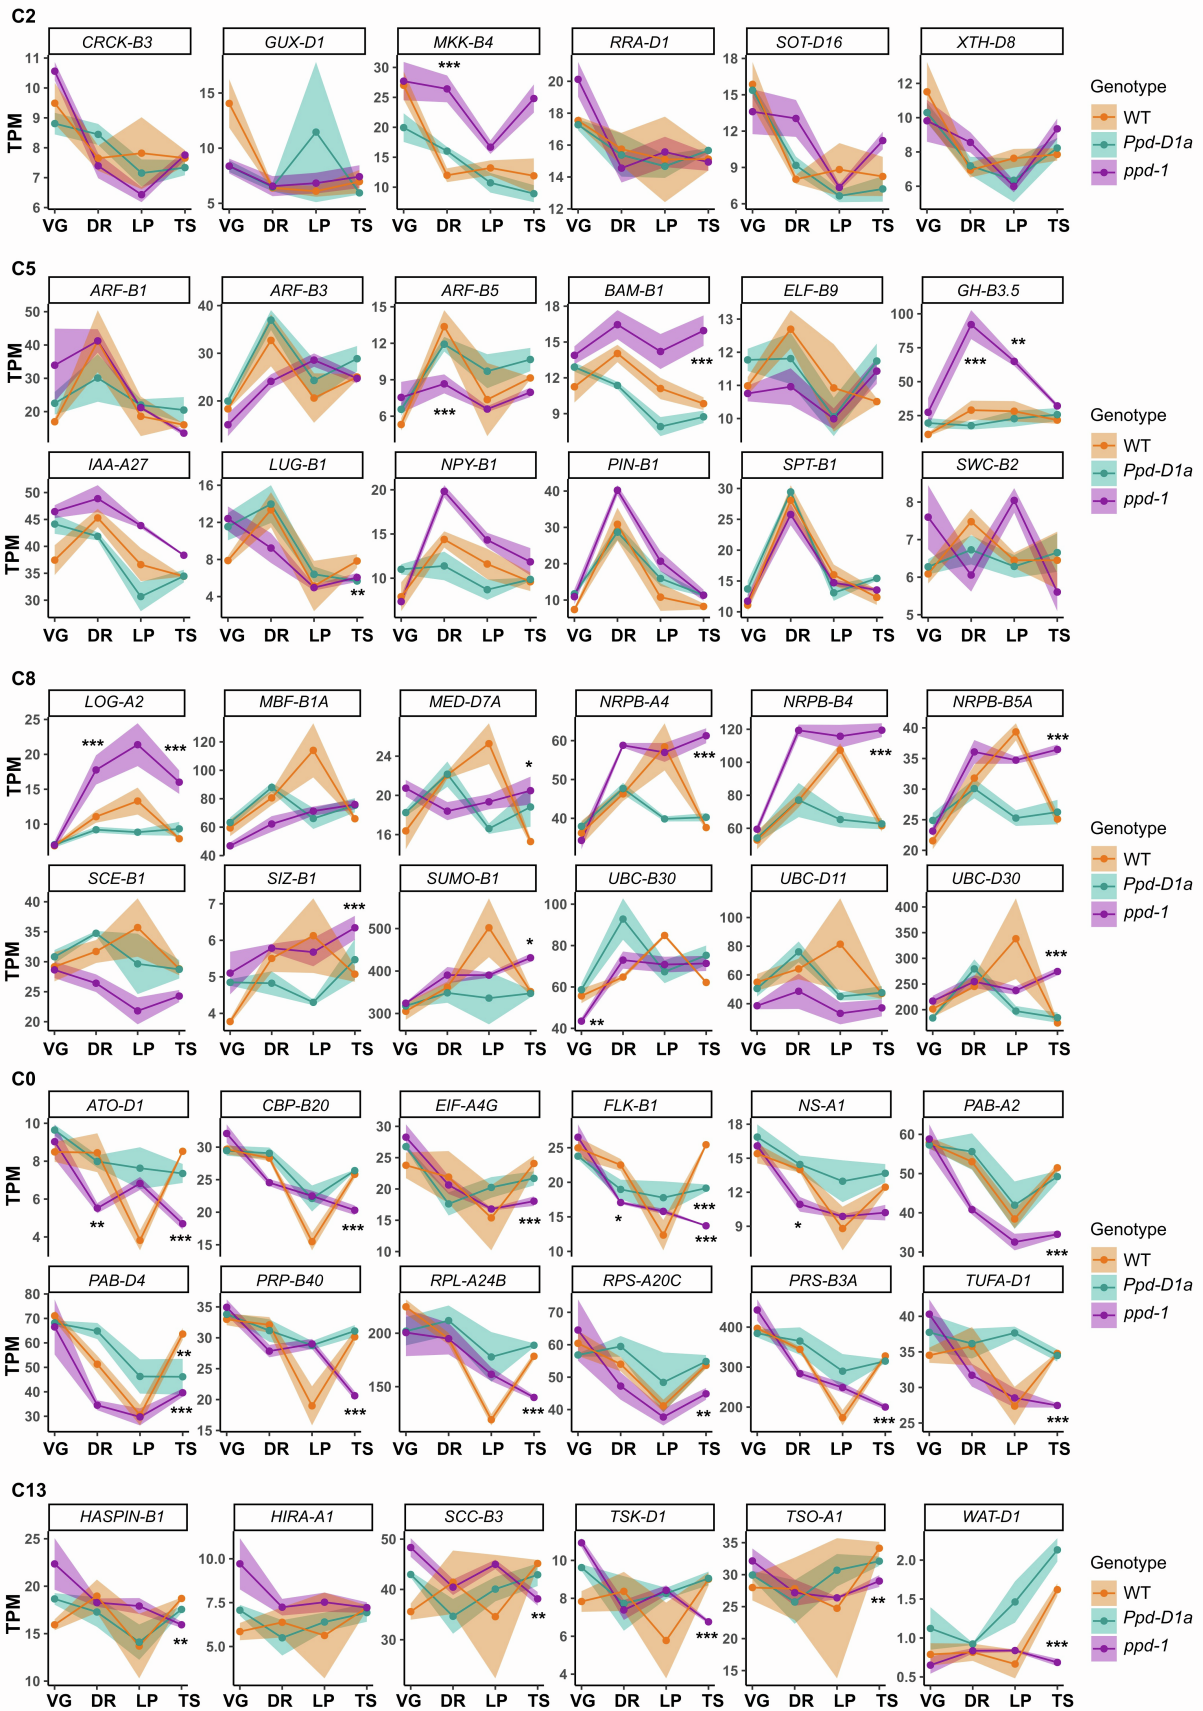

**Figure S2: Expression profiles of transcripts identified from each of the stage-specific clusters, related to Figures 1 and 2.** Example expression profiles of transcripts from the identified GO-terms of C2 (VG), C5 (DR), C0 (LP), C8 (LP) and C13 (TS) of the developing inflorescence transcriptome analysis from wild-type plants. Data are presented as ribbon plots that show transcript levels (TPM, solid line with data points)  $\pm$  s.e.m. (shaded region) of three biological replicates from the wild-type (WT, orange), photoperiod insensitive (*Ppd-D1a*, cyan) and null (*ppd-1*, magenta) genotypes. Stages include vegetative (VG), double ridge (DR), lemma primordium (LP) and terminal spikelet (TS) stages. \*,  $P < 0.05$ ; \*\*,  $P < 0.01$ ; \*\*\*,  $P < 0.001$ .

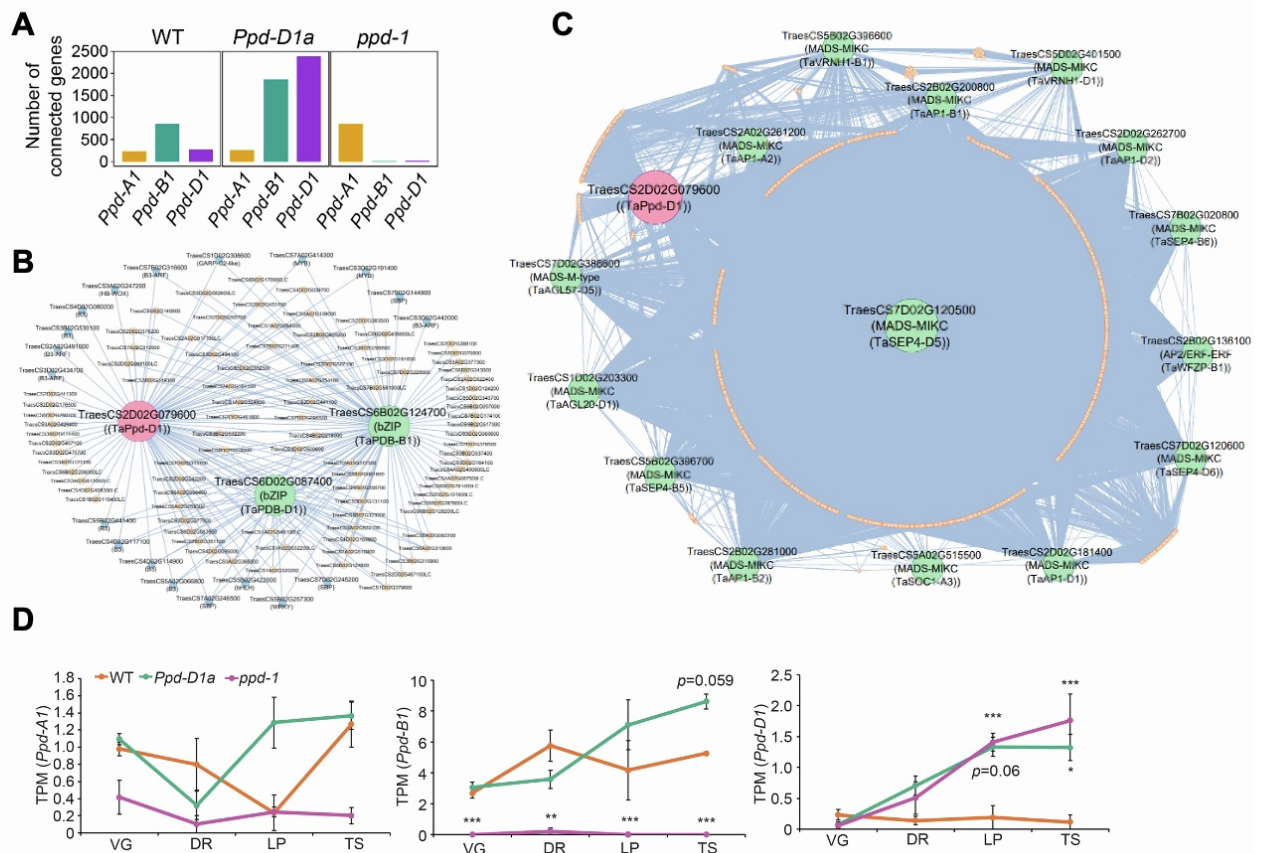

**Figure S3: Co-expression gene network analysis and analysis of *Ppd-1* expression during early inflorescence development, related to Figures 2, 3 and 5. (A)** A summary of genes connected to each of the *Ppd-1* homeologs in the co-expression networks constructed for the photoperiod insensitive (*Ppd-D1a*) and null (*ppd-1*), and wild type (WT). **(B-C)** A sub-network showing genes connected to *Ppd-D1* in the co-expression network of developing inflorescences from **(B)** wild-type (WT) and **(C)** photoperiod insensitive NIL. Guide genes shown in green circles are those shown to perform roles during inflorescence development in wheat and other plant species and *Ppd-D1* gene is shown as a red circle. Blue circles represent transcription factor genes. Edge weight = 1 was used as threshold to visualise genes in the subnetwork using Cytoscape 3.10.1 software. **(D)** Transcript values for *Ppd-A1*, *Ppd-B1* and *Ppd-D1* in wild-type (WT, orange), photoperiod insensitive (cyan, *Ppd-D1a*) and null (*ppd-1*, pink) NILs during the vegetative (VG), double ridge (DR), lemma primordium (LP) and terminal spikelet (TS) stages. Data are TPM  $\pm$  s.e.m. of three biological replicates; \*,  $P < 0.05$ ; \*\*,  $P < 0.01$ ; \*\*\*,  $P < 0.001$ .



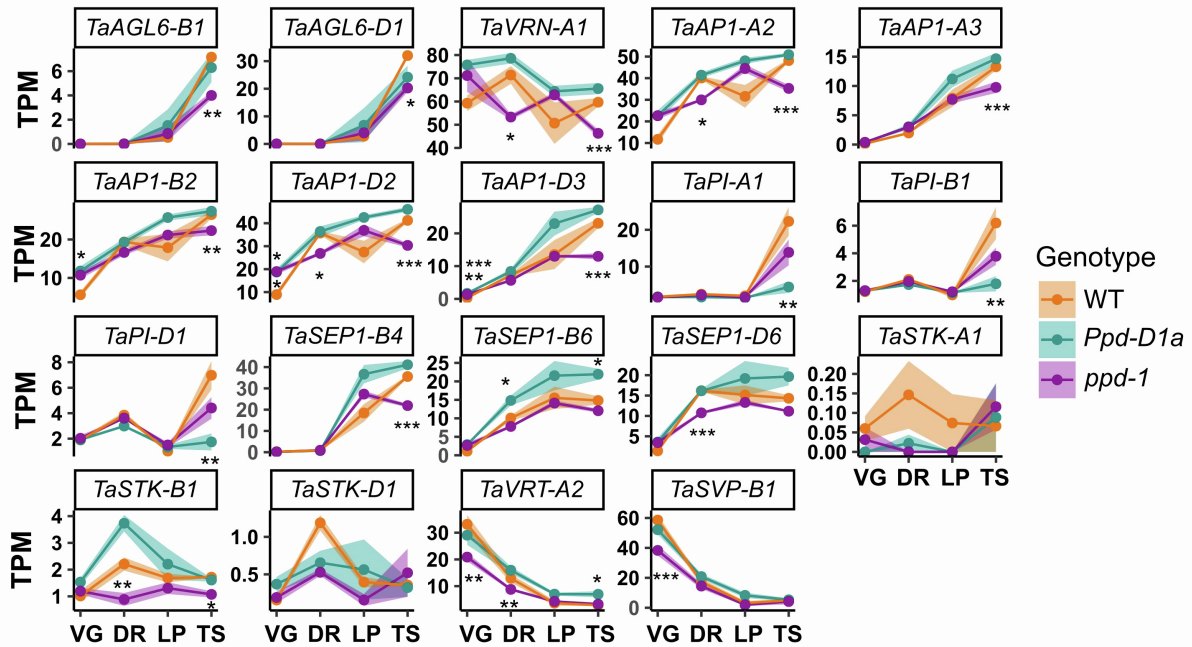

**Figure S4: Stage-specific expression profiles of transcripts encoding MADS-box transcription factors, related to Figure 4.** Expression profiles of transcripts encoding MADS-box transcription factors in the developing inflorescence, which show a modified developmental expression pattern in either the *Ppd-D1a* (cyan) or *ppd-1* (magenta) NILs, relative to wild-type (orange). Data are presented as ribbon plots that show transcript levels (TPM, solid line with data points)  $\pm$  s.e.m. (shaded region) of three biological replicates. Stages include vegetative (VG), double ridge (DR), lemma primordium (LP) and terminal spikelet (TS) stages. \*,  $P < 0.05$ ; \*\*,  $P < 0.01$ ; \*\*\*,  $P < 0.001$ .

*pdb1\_m1*

*PDB-B1*

GCGCAAGCAGCG CCACCTCGACGACCTCGCCGCGCAGGCGGGCGCACCTCCGCCGCGAGAACGCGCACGTC  
GCGCA--GCGGGCGCACCTCCGCCGCGAGAACGCGCACGTC

*PDB-D1*

GCGCAAGCAGCG CCACCTCGACGACCTCGCCGCGCAGGCGGGCGCACCTGCGCCGCGAGAACGCGCACGTC  
GCGCAAGCAGCGCCACCT--GCGGGCGCGAGAACGCGCACGTC

*pdb1\_m2*

*PDB-A1*

GCGCAAGCAGCG CCACCTCGACGACCTCGCCGCGCAGGCGGGCGCACCTGCGCCGCGAGAACGCGCACGTC  
GCGCAAGCAGCGCCACCT--GCGGGCGCGAGAACGCGCACGTC

*PDB-D1*

GCGCAAGCAGCG CCACCTCGACGACCTCGCCGCGCAGGCGGGCGCACCTGCGCCGCGAGAACGCGCACGTC  
GCGCAAGCAGCGCCACCT--GCGGGCGCGAGAACGCGCACGTC

*alog1\_m1*

*ALOG-A1*

GGCAGCGCGTCGTCGGTGTGGGAGCGCCGCGGCCGA GCAGGTACGAGTCGCAGAAGCGGCGGGACTGGCAGACGTTTCGGGCAGTACCTACGGAACCACC GCCCCCGCTGGAGCTGGCGCGGTGC  
GGCAGCGCGTCGTCGGTGTGGGAGCGCCGCGGCCGAGCAGGTACGAGTCGCA--AGCGGGCGGGACTGGCAGACGTTTCGGGCAGTACCTACGGAACCACC GCCCCCGCTGGAGCTGGCGCGG--GCGCGGTGC

*ALOG-B1*

GGCAGCGCGTCGTCGGCGCTGGGAGCGCCGCGGCCGA GCAGGTACGAGTCGCAGAAGCGGCGGGACTGGCAGACGTTTCGGACAGTACCTACGGAACCACC GCCCCCGCTGGAGCTGGCGCGGTGC  
GGCAGCGCGTCGTCGGCGCTGGGAGCGCCGCGGCCGAGCAGGTACGAGTCGCAGAAGCGGGCGGGACTGGCAGACGTTTCGGACAGTACCTACGGAACCACC GCCCCCGCTGGAGCTGGCGCGG--GCGCGGTGC

*ALOG-D1*

GGCAGCGCGTCGTCGGCGCTGGGAGCGCCGCGGCCGA GCAGGTACGAGTCGCAGAAGCGGCGGGACTGGCAGACGTTTCGGGCAGTACCTACGGAACCACC GCCCCCGCTGGAGCTGGCGCGGTGC  
GGCA--GGGACTGGCAGACGTTTCGGGCAGTACCTACGGAACCACC GCCCCCGCTGGAGCTGGCGCGG

*alog1\_m2*

*ALOG-A1*

GGCAGCGCGTCGTCGGTGTGGGAGCGCCGCGGCCGA GCAGGTACGAGTCGCAGAAGCGGCGGGACTGGCAGACGTTTCGGGCAGTACCTACGGAACCACC GCCCCCGCTGGAGCTGGCGCGGTGC  
GGCAGCGCGTCGTCGGTGTGGGAGCGCCGCGGCCGAGCAGGTACGAGTCGCA--AGCGGGCGGGACTGGCAGACGTTTCGGGCAGTACCTACGGAACCACC GCCCCCGCTGGAGCTGGCGCGGTGC

*ALOG-B1*

GGCAGCGCGTCGTCGGCGCTGGGAGCGCCGCGGCCGA GCAGGTACGAGTCGCAGAAGCGGCGGGACTGGCAGACGTTTCGGACAGTACCTACGGAACCACC GCCCCCGCTGGAGCTGGCGCGGTGC  
GGCAGCGCGTCGTCGGCGCTGGGAGCGCCGCGGCCGAGCAGGTACGAGTCGCAGAAGCGGGCGGGACTGGCAGACGTTTCGGACAGTACCTACGGAACCACC GCCCCCGCTGGAGCTGGCGCGG--GCGCGGTGC

*ALOG-D1*

GGCAGCGCGTCGTCGGCGCTGGGAGCGCCGCGGCCGA GCAGGTACGAGTCGCAGAAGCGGCGGGACTGGCAGACGTTTCGGGCAGTACCTACGGAACCACC GCCCCCGCTGGAGCTGGCGCGGTGC  
GGCAGCGCGTCGTCGGCGCTGGGAGCGCCGCGGCCGAGCAGGTACGAGTCGCAGAAGCGGGCGGGACTGGCAGACGTTTCGGGCAGTACCTACGGAACCACC GCCCCCGCTGGAGCTGGCGCGGTGC

**Figure S5: A summary of the gene edits generated in the *pdb1* and *alog1*, related to Figure 6. The reference sequence for *PDB-A1*, *PDB-B1* and *PDB-D1*, and *ALOG-A1*, *ALOG-B1* and *ALOG-D1*, is provided in black text, with the guideRNA sequence highlighted in red (PAM is underlined). The gene edited sequence is shown underneath the reference (blue text), with deleted base pairs shown as dashes.**

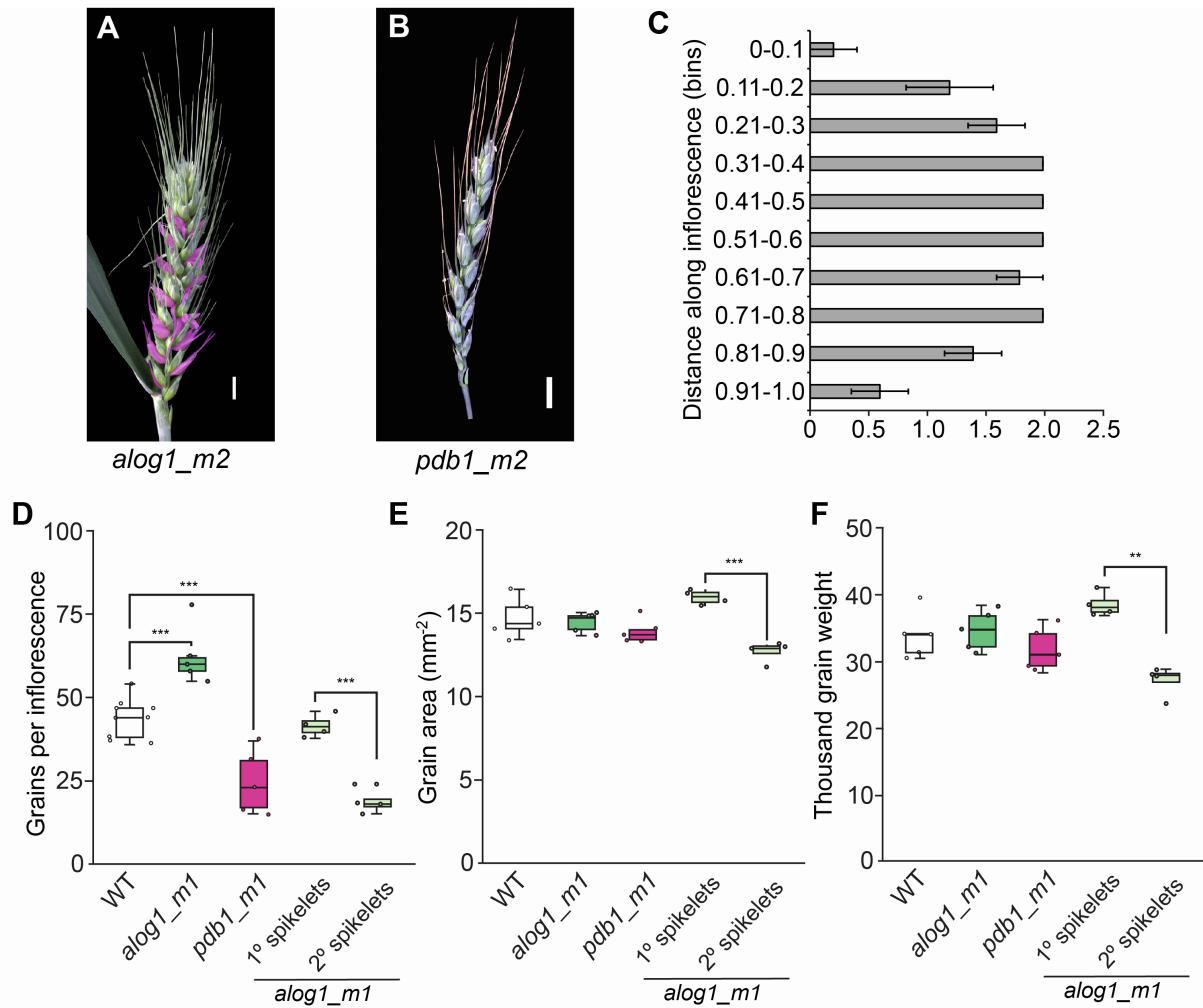

**Figure S6: Inflorescence architecture and grain phenotypes of the *ALOG1* and *PDB1* gene-edited lines, related to Figure 6. (A-B)** Representative inflorescences of the *alog1\_m2* line (A) and the *pdb1\_m2* line (B), with the secondary spikelets highlighted in pink. (C) The rachis nodes of the *alog1\_m1* lines that form paired spikelets are located predominantly in the central region of the inflorescence. (D-F) Grain number per inflorescence, grain area and thousand grain weight phenotypes for the *alog1\_m1* (green) and *pdb1\_m1* (pink) gene edited lines, relative to wild-type (WT, cv. Fielder). Data is also shown for grain isolated from the primary (1°) and secondary (2°) spikelets of nodes that formed paired spikelets in the *alog1\_m1* lines (light green). In the boxplots (D-F), each box is bound by the lower and upper quartiles, the central bar represents the median, and the whiskers indicate the minimum and maximum values of 4-5 biological replicates. \*\*,  $P < 0.01$ ; \*\*\*,  $P < 0.001$ .
